# Supplementary material for: Accuracy of upper respiratory tract samples to diagnose Mycobacterium tuberculosis: a systematic review and meta-analysis
Source: PubMed Central journal article supplement (PMC10547599; doi:10.1016/s2666-5247(23)00190-8), 2023-10
Supplement: mmc1.pdf [file mmc1.pdf]

# THE LANCET Microbe

## Supplementary appendix

This appendix formed part of the original submission and has been peer reviewed. We post it as supplied by the authors.

Supplement to: Savage HR, Rickman HM, Burke RM, et al. Accuracy of upper respiratory tract samples to diagnose *Mycobacterium tuberculosis*: a systematic review and meta-analysis. *Lancet Microbe* 2023; published online Sept 12. [https://doi.org/10.1016/S2666-5247\(23\)00190-8](https://doi.org/10.1016/S2666-5247(23)00190-8).

## Supplementary data tables and figures

### Supplementary tables

S1: Search strategy

S2: Table to show definition of confirmed, probable or not PTB by study.

S3: Full study information

S4: Excluded studies

S5: Table to show study characteristics

S6: Table of data from laryngeal swab reports used in meta-analysis.

S7: Laryngeal swab reference standard meta-regression and table of results

S8: Table of data from naso-pharyngeal aspirate reports used in meta-analysis.

S9: Nasopharyngeal reference standard meta-regression and table of results

S10: Table of data from naso-pharyngeal aspirate reports and clinical diagnosis as a reference standard used in the meta-analysis.

S11: Data table to show analysis of reports of oral swabs as sample type.

S12: Oral swab reference standard meta-regression and table of results

S13: Data table to show analysis of reports of other sample type data.

### Supplementary Figures:

SF1: Summary receiver operating curve of laryngeal sampling for active pulmonary tuberculosis, with random effects meta-analysis

SF2: Summary receiver operating curve of nasopharyngeal aspirate for active pulmonary tuberculosis, with random effects meta-analysis

SF3: Summary receiver operating curve of nasopharyngeal aspirate for active pulmonary tuberculosis when clinical diagnosis used as a reference standard, with random effects meta-analysis

SF4: Summary receiver operating curve of oral swab for active pulmonary tuberculosis, with random effects meta-analysis

SF5: Bias of individual studies presented via each domain question and overall rating.

SF6: Bias of individual studies presented by domain.

Table S1:

**Search strategy for systematic review**

|                                                                                                                                                                            |
|----------------------------------------------------------------------------------------------------------------------------------------------------------------------------|
| Search terms                                                                                                                                                               |
| ("Mycobacterium tuberculosis" OR "Mycobacterium tuberculosis complex" OR "tuberculosis" OR "TB" OR "consumption" OR "wasting" OR "thysis" OR "phtysis OR "Koch's Disease") |
| AND                                                                                                                                                                        |
| ("oral swab" OR "oral" OR "laryngeal swab" OR "laryngeal" OR "tonsils" OR "saliva" OR "Waldemeyers ring" OR "pharynx" OR "pharyngeal")                                     |
| AND                                                                                                                                                                        |
| ("diagnosis" OR "diagnostics" OR "samples" OR "sampling")                                                                                                                  |
| Plus database specific strategy terms                                                                                                                                      |
| Medline (1847-1950): Human                                                                                                                                                 |
| Medline (1950 – current): Human, Clinical Key: Diagnosis                                                                                                                   |
| Global Health: As above, remove consumption                                                                                                                                |
| Global Health archive: As above, remove consumption                                                                                                                        |

Supplementary table S2:

Table to show definition of confirmed, probable or not PTB by study.

| Paper      | Confirmed PTB                                   | Number | Probable PTB                                                                                                           | Number | Not TB                                       | Number |
|------------|-------------------------------------------------|--------|------------------------------------------------------------------------------------------------------------------------|--------|----------------------------------------------|--------|
| Owens 2007 | presence of a positive smear or culture for MTB |        | Probable PTB was suggested by hilar or mediastinal lymphadenopathy, local collapse/consolidation, severe bilateral but | 94     | No CXR changes as for probable TB not tested | 0      |

|               |                                                                   |    |                                                                                                                                                                                                                                                                                              |     |                                                                                                                                                          |     |
|---------------|-------------------------------------------------------------------|----|----------------------------------------------------------------------------------------------------------------------------------------------------------------------------------------------------------------------------------------------------------------------------------------------|-----|----------------------------------------------------------------------------------------------------------------------------------------------------------|-----|
|               | – taken from the probable TB group                                |    | asymmetric disease, cavitation or miliary changes. Chest radiographs were reviewed by JBSC who was blinded to the clinical details.                                                                                                                                                          |     |                                                                                                                                                          |     |
| Zar 2012      | Any specimen positive for M. tuberculosis on culture              | 87 | All others                                                                                                                                                                                                                                                                                   | 255 | Documented resolution of symptoms and signs at follow-up in children who didn't receive tuberculosis treatment                                           | 193 |
| Zar 2013      | Any induced sputum culture positive for M tuberculosis            | 30 | All other children                                                                                                                                                                                                                                                                           | 167 | Culture negative and documented resolution of symptoms and signs at a follow-up visit at 3 months in children who did not receive tuberculosis treatment | 187 |
| Cakir 2018    |                                                                   | 0  | Diagnosis of TB disease was established in accordance with the World Health Organization's TB Standards case definition – respiratory symptoms, radiological findings, tuberculin skin test positivity, history of contact with active TB, and acid fast bacillus and MTB culture positivity | 40  |                                                                                                                                                          | 0   |
| Zar 2019      | Culture positive for Mycobacterium tuberculosis (excluding Ultra) | 40 | Culture negative, clinically diagnosed with TB                                                                                                                                                                                                                                               | 104 | culture negative, not clinically diagnosed with TB, no tuberculosis treatment given, and documented improvement at 3-mo follow-up visit                  | 51  |
| Hanrahan 2018 | Microbiologically using smear, culture or Xpert on any one of     | 4  | No microbiological confirmation on any sample and at least two of the following: CXR consistent with TB, positive clinic response to                                                                                                                                                         | 100 | Unlikely TB were those Without mycobacteriological confirmation who did                                                                                  | 15  |

|             | the samples collected |  | anti-TB treatment, documented exposure to TB or a positive TST.                                                                                                                                                                                                                                                                                                                                                                                                                                                                                                                                                                                                                                                                                                                                             |     | not meet the criteria for unconfirmed TB. |    |
|-------------|-----------------------|--|-------------------------------------------------------------------------------------------------------------------------------------------------------------------------------------------------------------------------------------------------------------------------------------------------------------------------------------------------------------------------------------------------------------------------------------------------------------------------------------------------------------------------------------------------------------------------------------------------------------------------------------------------------------------------------------------------------------------------------------------------------------------------------------------------------------|-----|-------------------------------------------|----|
| Osorio 2020 |                       |  | (i) signs/symptoms: (a) persistent cough (>2 weeks), unremitting cough; (b) weight loss/failure to thrive; © persistent (>1 week), unexplained fever reported by guardian; (d) persistent, unexplained lethargy or reduced playfulness; (e) infants 0–60 days with additional signs and symptoms like neonatal pneumonia, unexplained hepatosplenomegaly or sepsis-like illness; (ii) findings on chest X-ray congruent with pulmonary TB (presence of lymphadenopathy and/or abnormalities consistent with TB as new infiltrates) and read by two blinded operators (clinician and TB expert); (iii) history of exposure to M. tuberculosis within the preceding 12 months; or (iv) response to antituberculosis treatment yet no acid-fast bacillus on the sputum smear or a negative Xpert MTB/RIF test. | 17  | No TB                                     | 28 |
| Song 2021   |                       |  | Participants had to have a visible cervical lymph node mass measuring >1 cm × 1 cm and persisting for >1 month despite antibiotic therapy for at least 5 days or a parenchymal abnormality on chest radiograph in addition to at least one of the following symptoms: 1) cough or wheezing >4 weeks not resolved after treatment with antibiotics, with cough continuing for at least 2 weeks after starting antibiotics (for hospitalized children only, respiratory distress or diagnosis of severe pneumonia not responding to antibiotics after 5                                                                                                                                                                                                                                                       | 294 |                                           |    |

|  |  |  |                                                                                                                                                                                                                                                                                                                                                                                                                                                                                                                                                                               |  |  |  |
|--|--|--|-------------------------------------------------------------------------------------------------------------------------------------------------------------------------------------------------------------------------------------------------------------------------------------------------------------------------------------------------------------------------------------------------------------------------------------------------------------------------------------------------------------------------------------------------------------------------------|--|--|--|
|  |  |  | days or any cough >4 weeks despite at least 5 days of antibiotics), 2) moderate or severe malnutrition (defined as weight-for-height Z score <-2 standard deviations (SD) or -3SD, respectively) not responding after 3 weeks of treatment for malnutrition, and 3) reported fever >7 days not responding after 5 days of antibiotics or antimalarials. Children were excluded from the study if they were currently on tuberculosis treatment or isoniazid preventive therapy (IPT) or had received treatment for tuberculosis in the past year or IPT in the last 6 months. |  |  |  |
|--|--|--|-------------------------------------------------------------------------------------------------------------------------------------------------------------------------------------------------------------------------------------------------------------------------------------------------------------------------------------------------------------------------------------------------------------------------------------------------------------------------------------------------------------------------------------------------------------------------------|--|--|--|

S Table S3:

Full descriptive data including methods used available as excel spreadsheet.

<https://osf.io/9nuvq>

Table S4:

**Excluded studies with reasons**

| Title                                                                                                                                                    | Year | Journal                                | First Author | Exclusion reason               |
|----------------------------------------------------------------------------------------------------------------------------------------------------------|------|----------------------------------------|--------------|--------------------------------|
| On Pulmonary Consumption, and on Bronchial and Laryngeal Disease, &c                                                                                     | 1847 | The Medico-chirurgical review          |              | Full text unavailable          |
| On Pulmonary Consumption; and on Bronchial and Laryngeal Disease; with Remarks on the Places of Residence Chiefly Resorted to by the Consumptive Invalid | 1853 | Edinburgh medical and surgical journal |              | Wrong study type - case report |
| The Pathology and Treatment of Pulmonary Tuberculosis; and on the Local Medication of                                                                    | 1854 | Edinburgh medical and surgical journal |              | No relevant testing            |

|                                                                                                                                         |      |                                                       |                      |                                  |
|-----------------------------------------------------------------------------------------------------------------------------------------|------|-------------------------------------------------------|----------------------|----------------------------------|
| Pharyngeal and Laryngeal Diseases, Mistaken for, or Associated with, Phthisis                                                           |      |                                                       |                      |                                  |
| Contribution to the History of Laryngeal Phthisis                                                                                       | 1875 | Medico-chirurgical transactions                       | Marcet, W.           | Background article               |
| The Laryngeal Complications of Consumption                                                                                              | 1882 | British medical journal                               | Williamson, J. M.    | No relevant testing              |
| Phthisis of the Larynx                                                                                                                  | 1883 | Edinburgh medical journal                             | Mackenzie, G. Hunter | No relevant testing              |
| Some Questions with Regard to Tuberculosis of the Upper Air Passages                                                                    | 1892 | Transactions. Medico-Chirurgical Society of Edinburgh | M'Bride, P.          | Wrong outcome                    |
| Clinical Remarks ON A CASE OF TUBERCULOUS DISEASE OF THE LUNGS AND LARYNX, SHOWING THE NEED FOR THE COMPULSORY NOTIFICATION OF PHTHISIS | 1906 | British medical journal                               | Bramwell, B.         | wrong study design               |
| Tuberculosis of the Larynx                                                                                                              | 1908 | Proceedings of the Royal Society of Medicine          | Hill, W.             | Wrong study design - case report |
| The Throat and Nose in the Aetiology of Tuberculosis                                                                                    | 1909 | The Hospital                                          |                      | Background article               |
| Tuberculosis of the Air-Passages above the Larynx                                                                                       | 1910 | The Hospital                                          |                      | Wrong outcome                    |
| Tuberculosis of the Tonsil, associated with Tuberculous Glands of Neck                                                                  | 1910 | Proceedings of the Royal Society of Medicine          | Carmichael, E. S.    | Wrong outcome                    |

|                                                                                                                                                             |      |                                                                                                              |               |                                  |
|-------------------------------------------------------------------------------------------------------------------------------------------------------------|------|--------------------------------------------------------------------------------------------------------------|---------------|----------------------------------|
| Tuberculosis of Pharynx                                                                                                                                     | 1910 | Proceedings of the Royal Society of Medicine                                                                 | Wylie, A.     | wrong study design               |
| Chronic Tuberculosis of the Nose, Larynx, and Lungs                                                                                                         | 1911 | Proceedings of the Royal Society of Medicine                                                                 | Parker, C. A. | wrong study design               |
| Laryngeal Tuberculosis                                                                                                                                      | 1912 | Proceedings of the Royal Society of Medicine                                                                 | Donelan, J.   | wrong study design               |
| Microscopical Sections from a Case of Tuberculous Ulcer of the Larynx; the First suggestive of Epithelioma, the Second of Non-bacillary Tuberculosis? Lupus | 1912 | Proceedings of the Royal Society of Medicine                                                                 | Grant, J. D.  | wrong study design               |
| Some Observations on Tuberculosis of the Nose and Pharynx                                                                                                   | 1912 | Bristol medico-chirurgical journal (1883)                                                                    | Wright, A. J. | Wrong study design - case report |
| A Post-mortem Specimen of Laryngeal Tuberculosis                                                                                                            | 1913 | Proceedings of the Royal Society of Medicine                                                                 | Davis, E. D.  | Wrong study design - case report |
| What Relation, if any, have the Faucial Tonsils to Pulmonary Tuberculosis?                                                                                  | 1913 | Transactions of the American Climatological Association for the year ... American Climatological Association | Ingals, E. F. | No relevant testing              |
| Tuberculosis of Pharynx and Larynx                                                                                                                          | 1913 | Proceedings of the Royal Society of Medicine                                                                 | McKenzie, D.  | wrong study design               |



|                                                                                                                                                                      |      |                                                                                                                           |                  |                     |
|----------------------------------------------------------------------------------------------------------------------------------------------------------------------|------|---------------------------------------------------------------------------------------------------------------------------|------------------|---------------------|
| Some of the Problems of Private Sanatoria for Tuberculosis as observed during Ten Years' Experience in the Pottenger Sanatorium for Diseases of the Lungs and Throat | 1914 | Transactions of the American Climatological and Clinical Association.<br>American Climatological and Clinical Association | Pottenger, F. M. | Background article  |
| THREE YEARS' SANATORIUM EXPERIENCE OF LARYNGEAL TUBERCULOSIS                                                                                                         | 1914 | British medical journal                                                                                                   | Thomson, S.      | No relevant testing |
| Tuberculosis of the Larynx                                                                                                                                           | 1920 | Transactions of the American Climatological and Clinical Association.<br>American Climatological and Clinical Association | Forster, A. M.   | Background article  |
| Two Cases of Pulmonary Tuberculosis with Laryngeal Symptoms                                                                                                          | 1923 | Proceedings of the Royal Society of Medicine                                                                              | Franklin, P.     | wrong study design  |
| Treatment of Laryngeal Tuberculosis in Sanatoria                                                                                                                     | 1923 | Transactions of the American Climatological and Clinical Association.<br>American Climatological                          | Parfitt, C. D.   | Wrong outcome       |

|                                                                                                                                                                      |      |                                              |                  |                         |
|----------------------------------------------------------------------------------------------------------------------------------------------------------------------|------|----------------------------------------------|------------------|-------------------------|
|                                                                                                                                                                      |      | and Clinical Association                     |                  |                         |
| Tuberculosis of the Larynx                                                                                                                                           | 1923 | Proceedings of the Royal Society of Medicine | Renshaw, J. A.   | wrong study design      |
| TUBERCULOSIS OF THE LARYNX: Sir StClair Thomson's Report                                                                                                             | 1924 | British medical journal                      |                  | No relevant testing     |
| Tuberculosis of the Larynx-Its Diagnosis and Treatment: A Plea for Closer Co-operation Between the Physician and Laryngologist                                       | 1924 | Canadian Medical Association journal         | Pentecost, R. S. | Background article      |
| Tuberculosis of Nasal Bones                                                                                                                                          | 1924 | Proceedings of the Royal Society of Medicine | Ridout, C. A.    | wrong study design      |
| The Mitchell Lecture ON TUBERCULOSIS OF THE LARYNX: ITS SIGNIFICANCE TO THE PHYSICIAN: Deliverd before the Royal College of Physicians of London, November 6th, 1924 | 1924 | British medical journal                      | Thomson, S.      | No relevant testing     |
| Tuberculosis of Larynx                                                                                                                                               | 1927 | Proceedings of the Royal Society of Medicine | Layton, T. B.    | wrong study design      |
| Infection of the Upper Respiratory Tract as an Etiological Factor in Pulmonary Disease                                                                               | 1930 | Canadian Medical Association Journal         | Smith, I. R.     | Background article      |
| Primary Infection and Pulmonary Tuberculosis in Adults. / Om Primaerinfektion og Lungetuberkulosen hos Voksne                                                        | 1931 | Ugeskrift for Laeger                         | Heckscher, H.    | Full text not available |
| Tuberculosis of Larynx                                                                                                                                               | 1931 | Proceedings of the Royal Society of Medicine | Wylie, A.        | wrong study design      |

|                                                                                         |      |                                                        |                     |                         |
|-----------------------------------------------------------------------------------------|------|--------------------------------------------------------|---------------------|-------------------------|
| INCIDENCE OF TUBERCULOSIS OF THE TONSIL                                                 | 1932 | Canadian Medical Association journal                   | Heaton, T. G.       | Background article      |
| Tubercle Bacilli in the Gastric Contents of Tuberculous Children. A Study of 59 Cases   | 1934 | American Review of Tuberculosis and Pulmonary Diseases | Gourley, Ina        | Full text not available |
| Present Concepts of Tuberculous Infection and Disease. Their Principles and Application | 1935 | American Review of Tuberculosis and Pulmonary Diseases | Opie, E. L.         | Full text not available |
| Tuberculosis in Some Rare Situations, Namely Tonsils and Uterus                         | 1936 | The Indian medical gazette                             | Krishnaswamy, K. G. | Background article      |
| The Importance of Gastric Lavage for the Demonstration of Tubercle Bacilli in Adults    | 1937 | Acta Medica Scandinavica                               | Gullbring, A.       | Wrong sample type       |
| Tuberculosis of the Larynx                                                              | 1939 | Proceedings of the Royal Society of Medicine           | Suggit, S.          | wrong study design      |
| The Routine Examination for Tubercle Bacilli in Sputum                                  | 1940 | Tubercle                                               | Hunter, R. A.       | Wrong sample type       |
| Gastric Contents in Tuberculous Children                                                | 1941 | American Review of Tuberculosis and Pulmonary Diseases | Floyd, C            | Wrong sample type       |
| Observations on Tuberculosis of the Larynx                                              | 1941 | Edinburgh medical journal                              | Martin, G. Ewart    | Background article      |
| Discussion on Primary Tuberculosis in Adolescents and Adults                            | 1942 | Proceedings of the Royal Society of Medicine           | Kayne, G. G         | Background article      |

|                                                                                                                                                                                                                                                                                                       |      |                                                                                                                |               |                                       |
|-------------------------------------------------------------------------------------------------------------------------------------------------------------------------------------------------------------------------------------------------------------------------------------------------------|------|----------------------------------------------------------------------------------------------------------------|---------------|---------------------------------------|
| The Clinical Value of Faeces Examination for Tubercle Bacilli in the Course of Pulmonary Tuberculosis. Results of a New Method of Examination. / Ueber den klinischen Wert des Stuhlnachweises von Tuberkelbazillen im Verlaufe der Lungentuberkulose. Ergebnisse eines neuen Untersuchungsverfahrens | 1942 | Deutsche Medizinische Wochenschrift                                                                            | Wolf, J. E.   | Wrong sample type                     |
| Tuberculosis of the Tonsils                                                                                                                                                                                                                                                                           | 1943 | The American journal of pathology                                                                              | Rather, L. J. | Background article                    |
| The Detection of Tubercle Bacilli by Deep Culture in Kirehner's Fluid Medium. / Der Nachweis der Tuberkelbazillen in der Tiefenkultur im flÄ¼ssigen NÄ¼hrboden nach Kirchner                                                                                                                          | 1943 | Zentralblatt fur Bakteriologie, Parasitenkunde, Infektionskrankheiten und Hygiene                              | Sula, L.      | Wrong outcome - laboratory validation |
| Pulmonary Lavage in the Diagnosis of Tuberculosis. / O lavado pulmonar. No diagnÃ³stico etio-patogÃ©nico ou evolutivo da tuberculose                                                                                                                                                                  | 1944 | Boletin de la Oficina Sanitaria Panamericana                                                                   | De Abreu, M.  | Wrong outcome                         |
| Tubercle Bacilli in the Stomach Contents of Healthy, Normal Adults exposed to Tuberculosis                                                                                                                                                                                                            | 1944 | American Review of Tuberculosis and Pulmonary Diseases                                                         | Smith, C. R.  | Wrong outcome                         |
| Tonsillectomy for tuberculosis                                                                                                                                                                                                                                                                        | 1945 | Schweizerische Zeitschrift fur Tuberkulose. Revue suisse de la tuberculose. Rivista svizzera della tubercolosi | Escher, F.    | Full text unavailable                 |

|                                                                                                           |      |                                                 |                       |                       |
|-----------------------------------------------------------------------------------------------------------|------|-------------------------------------------------|-----------------------|-----------------------|
| About the oral tubercular primary complex and the post-primary lupoid of the gingiva                      | 1945 | Schweizerische medizinische Wochenschrift       | Nager, : Fanconi      | Full text unavailable |
| Tuberculosis of the tonsils                                                                               | 1946 | Archives of otolaryngology                      | Bernstein, D.         | Upper Resp TB         |
| Laryngeal tuberculosis                                                                                    | 1946 | Diseases of the chest                           | Humphries, M. K., Jr. | Full text unavailable |
| Tuberculous ulcer of the tongue                                                                           | 1946 | Prensa medica argentina                         | Steinberg, I. R.      | Full text unavailable |
| Tuberculous sinuses                                                                                       | 1946 | The Medical journal of Australia                | Stokes, E. H.         | Full text unavailable |
| Pulmonary, laryngeal, and intestinal tuberculosis and pulmonary water cyst                                | 1947 | Gaceta medica de Lima                           |                       | Full text unavailable |
| LARYNGEAL tuberculosis                                                                                    | 1947 | Manitoba medical review                         |                       | Full text unavailable |
| Tuberculosis of the mouth                                                                                 | 1947 | Annals of dentistry                             | Brodsky, R. H.        | Full text unavailable |
| On the functional pathology of laryngeal tuberculosis; comparative clinical and histological examinations | 1947 | Archiv fur Ohren-, Nasen- und Kehlkopfheilkunde | Eschweiler, H.        | Full text unavailable |
| [Tuberculosis of the middle ear and larynx]                                                               | 1947 | Jornal do medico                                | Larroude, C.          | Full text unavailable |
| Cutaneous and laryngeal tuberculosis and Charpy method                                                    | 1947 | Maroc medical                                   | Lepinay               | Upper Resp TB         |
| Oral tuberculosis                                                                                         | 1947 | Revista dental de Chile                         | Louvel Bert, R.       | Full text unavailable |
| Tuberculous tonsillitis                                                                                   | 1947 | Schweizerische medizinische Wochenschrift       | Taillens, J. P.       | Full text unavailable |
| Laryngeal tuberculosis in infancy                                                                         | 1947 | Policlinico infantile                           | Tavani, E.            | Full text unavailable |

|                                                                                                           |      |                                                            |                            |                       |
|-----------------------------------------------------------------------------------------------------------|------|------------------------------------------------------------|----------------------------|-----------------------|
| Tuberculosis of the oral mucosa                                                                           | 1948 | Deutsche<br>dentistische<br>Zeitschrift                    | Bachmann, W.               | Full text unavailable |
| Tuberculous laryngitis; a controlled study                                                                | 1948 | American review<br>of tuberculosis                         | Black, J. P. M.            | Full text unavailable |
| Comments on laryngeal tuberculosis                                                                        | 1948 | L'union medicale<br>du Canada                              | Brahy, J.                  | Full text unavailable |
| Tuberculosis of the larynx                                                                                | 1948 | Acta oto-rhino-<br>laryngologica<br>Belgica                | De Prest, R. A.            | Full text unavailable |
| On tuberculosis of the nose, pharynx and<br>tonsils                                                       | 1948 | Practica medica                                            | Jimenez Encina, C.         | Full text unavailable |
| Contribution to the study of the so-called<br>latent tuberculosis of the lymphatic ring of<br>Waldeyer    | 1948 | Practica oto-<br>rhino-<br>laryngologica                   | Langraf, F.                | Full text unavailable |
| Laryngeal tuberculosis; observations based on<br>an experience of 28 years with laryngeal<br>tuberculosis | 1948 | The Annals of<br>otology,<br>rhinology, and<br>laryngology | Looper, E. A               | Wrong outcome         |
| Tuberculosis infection of the palatine tonsils                                                            | 1948 | Revista espanola<br>de tuberculosis                        | Vassallo De<br>Mumbert, A. | Full text unavailable |
| Tuberculosis of the tongue                                                                                | 1948 | La Semana<br>medica                                        | Vergelin, H. E             | Full text unavailable |
| Tonsil tuberculosis in childhood                                                                          | 1949 | Schweizerische<br>medizinische<br>Wochenschrift            | Banhidy, F.                | Duplicate             |
| Tuberculosis of the Tonsils in Infancy. /<br>Tonsillentuberkulose im Kindesalter                          | 1949 | Schweizerische<br>Medizinische<br>Wochenschrift            | BÃNhidly, F.               | Wrong outcome         |
| Tubercle Bacilli in Pathological Material from<br>Patients with Miliary Tuberculosis : Study of           | 1949 | Bulletin et<br>Memoires de la                              | Bernard, E                 | Wrong sample type     |

|                                                                                                                                            |      |                                        |                        |                       |
|--------------------------------------------------------------------------------------------------------------------------------------------|------|----------------------------------------|------------------------|-----------------------|
| 114 Cases. / La recherche du bacille tuberculeux dans les tuberculoses micronodulaires. (Etude sur 114 cas.)                               |      | Societe Medicale des Hopitaux de Paris |                        |                       |
| Nasal mucosal tuberculosis                                                                                                                 | 1949 | Nordisk medicin                        | Froste, N.             | Full text unavailable |
| Tuberculosis of the Nasal Mucous Membranes. / N sslemhinnetuberkulos                                                                       | 1949 | Nordisk Medicin                        | Froste, N.             | wrong study design    |
| Tuberculous larynx                                                                                                                         | 1949 | Archivos medicos mexicanos             | Fumagallo Perez, L.    | Full text unavailable |
| Tuberculosis of the tongue                                                                                                                 | 1949 | Dental items of interest               | Gergely, L             | Full text unavailable |
| Laryngeal tuberculosis                                                                                                                     | 1949 | Archives of otolaryngology             | Looper, E. A.          | Wrong outcome         |
| [Tuberculosis of the larynx]                                                                                                               | 1950 | Medicina, cirurgia, farmacia           | Blundi, E              | Full text unavailable |
| [Laryngeal tuberculosis]                                                                                                                   | 1950 | Acta oto-rhino-laryngologica Belgica   | Dupont, P.             | Full text unavailable |
| [Statistical data on the frequency and evolution of laryngeal tuberculosis before the use of streptomycin]                                 | 1950 | Journal de medecine de Lyon            | Piaget, F              | Wrong outcome         |
| Failure in the Demonstration of Tubercle Bacilli in Gastric Washings. / Svikt i p visingen av tuberkelbasiller i ventrikkelskyllevann      | 1951 | Nordisk Medicin                        | Rambl, K.              | Wrong sample type     |
| A Nonchromogenic Culture of an Acid-Fast Bacillus isolated from the Nasal Mucus of a Leprosy Patient; its Virulence for Laboratory Animals | 1952 | International Journal of Leprosy       | De Souza-Araujo, H. C. | Wrong outcome         |
| Tuberculosis in Childhood, as disclosed or confirmed by Cultivation of Mycobacterium tuberculosis from Gastric Content                     | 1952 | Medical Journal of Australia           | Webster, R.            | Wrong sample type     |

|                                                                                                                                                 |      |                                        |                       |                                  |
|-------------------------------------------------------------------------------------------------------------------------------------------------|------|----------------------------------------|-----------------------|----------------------------------|
| Unclassified Mycobacteria in the Gastric Contents of Healthy Personnel and of Patients of a Tuberculosis Hospital                               | 1960 | American Review of Respiratory Disease | Atwell, R. J          | Wrong sample type                |
| Pulmonary tuberculosis in dog diagnosed by a positive culture of Mycobacterium tuberculosis from laryngeal swab                                 | 1967 | American Review of Respiratory Disease | Trujillo-Rojas, R. A. | No relevant testing              |
| LARYNGEAL TUBERCULOSIS                                                                                                                          | 1977 | American Journal of Roentgenology      | Lindell, M. M         | Wrong outcome                    |
| Diagnosis of nasopharyngeal tuberculosis by detection of tuberculostearic acid in formalin fixed, paraffin wax embedded tissue biopsy specimens | 1988 | Journal of clinical pathology          | Arnold, M             | Wrong outcome                    |
| LARYNGEAL TUBERCULOSIS REVISITED                                                                                                                | 1992 | American Family Physician              | Riley, E. C.          | Full text unavailable            |
| An exceptional localization of upper respiratory tract tuberculosis: The tonsil                                                                 | 1996 | Semaine Des Hopitaux                   | Raji, A               | Wrong study design - case report |
| Risk of tuberculosis transmission in dentistry                                                                                                  | 1997 | AAOHN Journal                          | Murphy, D. C          | No relevant testing              |
| Search for Mycobacterium paratuberculosis DNA in orofacial granulomatosis and oral Crohn's disease tissue by polymerase chain reaction          | 1997 | Gut                                    | Riggio, M. P          | Wrong pathogen                   |
| Diagnosis of tuberculosis in sputum negative patients in Dar es Salaam                                                                          | 1999 | East African Medical Journal           | Aris, E. A            | Full text unavailable            |
| Changing trends in clinical manifestations of laryngeal tuberculosis                                                                            | 2000 | Laryngoscope                           | Shin, J. E            | Wrong outcome                    |
| Laryngeal tuberculosis                                                                                                                          | 2000 | American Journal of Otolaryngology     | Yencha, M. W          | Wrong outcome                    |
| Laryngeal tuberculosis                                                                                                                          | 2004 | Lancet Infectious Diseases             | Krecicki, T           | wrong study design               |



|                                                                                                                           |      |                                                          |                     |                    |
|---------------------------------------------------------------------------------------------------------------------------|------|----------------------------------------------------------|---------------------|--------------------|
| A comparative study of the diagnosis of pulmonary tuberculosis using conventional tools and polymerase chain reaction     | 2006 | Indian Journal of Tuberculosis                           | Kavita, Modi-Parekh | Wrong sample type  |
| Tuberculosis of tonsil associated with pulmonary foci                                                                     | 2008 | Indian Journal of Otolaryngology and Head & Neck Surgery | Santosh, U. P       | wrong study design |
| Laryngeal involvement in patients with active pulmonary tuberculosis                                                      | 2008 | European Archives of Oto-Rhino-Laryngology               | Topak, M            | Upper Resp TB      |
| Is routine pathological examination required in South African children undergoing adenotonsillectomy?                     | 2009 | SAMJ - South African Medical Journal                     | Lierop, A. C. van   | Background article |
| Laryngeal tuberculosis                                                                                                    | 2010 | Journal of Otolaryngology-Head & Neck Surgery            | Cherkaoui, A        | wrong study design |
| Clinical utility of a commercial LAM-ELISA assay for TB diagnosis in HIV-infected patients using urine and sputum samples | 2010 | PloS one                                                 | Dheda, Keertan      | Wrong outcome      |
| 18F-FDG PET/CT findings of pharyngeal tuberculosis                                                                        | 2010 | Annals of Nuclear Medicine                               | Ito, K.             | Background article |
| Tuberculosis of the oral cavity: a systematic review                                                                      | 2010 | European Journal of Oral Sciences                        | Kakisi, O. K.       | Background article |
| The TDR tuberculosis specimen bank: a resource for diagnostic test developers                                             | 2010 | International Journal of Tuberculosis and Lung Disease   | Nathanson, C. M.    | Background article |

|                                                                                                                                                                      |      |                                                                    |                |                     |
|----------------------------------------------------------------------------------------------------------------------------------------------------------------------|------|--------------------------------------------------------------------|----------------|---------------------|
| Nasal tuberculosis--an update of current clinical and laboratory investigation                                                                                       | 2011 | The Journal of laryngology and otology                             | Masterson, L.  | wrong study design  |
| Detection and identification of Mycobacterium tuberculosis and Mycobacterium bovis from clinical species using DNA microarrays                                       | 2012 | Journal of Veterinary Diagnostic Investigation                     | Jia, K         | Wrong population    |
| Laryngoscopic characteristics and diagnosis of laryngeal tuberculosis                                                                                                | 2012 | Journal of Otolaryngology and Ophthalmology of Shandong University | Yu, Ping       | wrong study design  |
| Assessment of the Xpert MTB/RIF assay for diagnosis of tuberculosis with gastric lavage aspirates in children in sub-Saharan Africa: a prospective descriptive study | 2013 | The Lancet. Infectious diseases                                    | Bates, Matthew | Wrong sample type   |
| Secondary laryngeal tuberculosis revisited                                                                                                                           | 2015 | Lung India                                                         | Lodha, J. V    | wrong study design  |
| Morphological aspects in tuberculosis of oral cavity our experience and a review of the literature attempt                                                           | 2015 | Romanian Journal of Morphology and Embryology                      | Popescu, M. R  | wrong study design  |
| Tuberculous cheilitis revealing pulmonary tuberculosis. / Chéilite tuberculeuse révélant une tuberculose pulmonaire                                                  | 2016 | Pan African Medical Journal                                        | Bricha, M      | Upper Resp TB       |
| Tuberculous cheilitis revealing pulmonary tuberculosis                                                                                                               | 2016 | Pan African Medical Journal                                        | Bricha, M      | Duplicate           |
| Respiratory microbes present in the nasopharynx of children hospitalised with suspected pulmonary tuberculosis in Cape Town, South Africa                            | 2016 | BMC Infectious Diseases                                            | Dube, Felix S  | No relevant testing |

|                                                                                                                                                                                                     |      |                                               |                     |                                |
|-----------------------------------------------------------------------------------------------------------------------------------------------------------------------------------------------------|------|-----------------------------------------------|---------------------|--------------------------------|
| Nasal swab real-time PCR is not suitable for in vivo diagnosis of bovine tuberculosis                                                                                                               | 2017 | Pesquisa Veterinária Brasileira               | Mayer, F. Q         | Wrong population               |
| ORAL LOCALIZATION OF TUBERCULOSIS: CASE REPORT AND LITERATURE REVIEW                                                                                                                                | 2017 | Journal of Medical and Surgical Research      | Nabih, O            | wrong study design             |
| Performance of the Xpert MTB/RIF assay in the diagnosis of tuberculosis in formalin-fixed, paraffin-embedded tissues                                                                                | 2017 | International journal of mycobacteriology     | Polepole, Pascal    | Wrong sample type              |
| Repertoire of bacterial species cultured from the human oral cavity and respiratory tract                                                                                                           | 2018 | Future Microbiology                           | Fonkou, M. D. M     | wrong study design             |
| GeneXpert MTB/RIF Outperforms Mycobacterial Culture in Detecting Mycobacterium tuberculosis from Salivary Sputum                                                                                    | 2018 | BioMed Research International                 | Shi, Jin            | Wrong sample type              |
| Detection of Mycobacterium tuberculosis purified ESAT-6 (Rv3875) by magnetic bead-coupled gold nanoparticle-based immuno-PCR assay                                                                  | 2018 | International Journal of Nanomedicine         | Singh, N            | Wrong outcome - lab validation |
| Laryngeal tuberculosis diagnosed in a pathological laboratory in Senegal (2011-2015). / La tuberculose laryngéenne diagnostiquée dans un laboratoire d'anatomie pathologique du Sénégal (2011-2015) | 2018 | Bulletin de la Société de Pathologie Exotique | Thiam, I            | wrong study design             |
| Molecular Detection of Mycobacterium tuberculosis from Stools in Young Children by Use of a Novel Centrifugation-Free Processing Method                                                             | 2018 | Journal of clinical microbiology              | Walters, Elisabetta | Wrong sample type              |

|                                                                                                                                                                        |      |                                              |                    |                                |
|------------------------------------------------------------------------------------------------------------------------------------------------------------------------|------|----------------------------------------------|--------------------|--------------------------------|
| Guidance for Studies Evaluating the Accuracy of Biomarker-Based Nonsputum Tests to Diagnose Tuberculosis                                                               | 2019 | The Journal of infectious diseases           | Drain, Paul K      | Background article             |
| Lipoarabinomannan in sputum to detect bacterial load and treatment response in patients with pulmonary tuberculosis: Analytic validation and evaluation in two cohorts | 2019 | PLoS medicine                                | Kawasaki, Masanori | Wrong sample type              |
| Urine Xpert MTB/RIF for the diagnosis of childhood tuberculosis                                                                                                        | 2019 | International Journal of Infectious Diseases | Lopez, A. L        | Wrong outcome                  |
| Liquid mycobacterial culture outcomes after different sputum collection techniques before and during treatment                                                         | 2019 | Tuberculosis (Edinburgh, Scotland)           | Lourens, Madeleine | Wrong sample type              |
| Prevalence of oral lesions in tuberculosis: a cross sectional study                                                                                                    | 2019 | Journal of Family Medicine and Primary Care  | Purnendu, Rout     | wrong study design             |
| Sample adequacy controls for infectious disease diagnosis by oral swabbing                                                                                             | 2020 | PloS one                                     | Deviaene, Meagan   | Wrong outcome - lab validation |
| Tonsillar Tuberculosis                                                                                                                                                 | 1945 | Fichero medico terapeutico                   | Hamuy, D. J        | Full text unavailable          |
| [Examination of stomach contents and laryngeal mucus in adult tubercular patients]                                                                                     | 1945 | Problemy tuberkuleza                         | Klebanova, A. A.   | Full text unavailable          |
| Laryngeal tuberculosis                                                                                                                                                 | 1946 | Archives of otolaryngology                   | Auerbach, O.       | Background article             |
| Tonsils and tuberculosis                                                                                                                                               | 1946 | Medecine et hygiene                          | Vetter, H.         | Full text unavailable          |
| Subcutaneous gum tuberculosis and pulmonary tuberculosis                                                                                                               | 1947 | Le Poumon                                    | Delord, M.         | Full text unavailable          |

|                                                                                                                                      |      |                                                                                                                                        |                      |                       |
|--------------------------------------------------------------------------------------------------------------------------------------|------|----------------------------------------------------------------------------------------------------------------------------------------|----------------------|-----------------------|
| Tonsils and tuberculosis                                                                                                             | 1947 | Schweizerische medizinische Wochenschrift                                                                                              | Vetter, H.           | Full text unavailable |
| About the development of tonsil tuberculosis                                                                                         | 1947 | Schweizerische Zeitschrift für Pathologie und Bakteriologie. Revue suisse de pathologie et de bacteriologie                            | Wegelin, C.          | Full text unavailable |
| Histological research on the participation of tonsillary lymphatic tissue in the tubercular process                                  | 1948 | Annali dell'Istituto "Carlo Forlanini"                                                                                                 | Colantuono, P.       | Full text unavailable |
| Tomography of larynx in disseminated pulmonary tuberculosis                                                                          | 1949 | Diseases of the chest                                                                                                                  | Espinoza Galarza, M. | Full text unavailable |
| Hypopharyngeal (Laryngeal) Swabbing for the Cultural Diagnosis of Pulmonary Tuberculosis. A Statement of the Laboratory Subcommittee | 1956 | American Review of Tuberculosis and Pulmonary Diseases                                                                                 | A. J. O'Hea.         | Background article    |
| Catarrhal Affections of the Nasal Passages as a Cause of Pulmonary Phthisis, with Special Reference to the Question of Heredity      | 1886 | Transactions of the ... Annual Meeting of the American Climatological Association. American Climatological Association. Annual Meeting | Jarvis, W. C.        | Wrong outcome         |
| The Tonsil in Tuberculosis                                                                                                           | 1898 | The Hospital                                                                                                                           |                      | Wrong test type       |
| The Recognition of Early Changes in the Larynx in Tuberculosis                                                                       | 1913 | Transactions of the American                                                                                                           | Casselberry, W. E.   | Wrong test type       |

|                                                                                                                                                                                                                              |      |                                                                                    |                     |                                  |
|------------------------------------------------------------------------------------------------------------------------------------------------------------------------------------------------------------------------------|------|------------------------------------------------------------------------------------|---------------------|----------------------------------|
|                                                                                                                                                                                                                              |      | Climatological Association for the year ...<br>American Climatological Association |                     |                                  |
| Laryngeal Lesion associated with Apparent Miliary Tuberculosis of the Lung                                                                                                                                                   | 1927 | Proceedings of the Royal Society of Medicine                                       | Howarth, W.         | Wrong study design - case report |
| TUBERCULOSIS OF THE LARYNX                                                                                                                                                                                                   | 1929 | British medical journal                                                            | Howarth, W. G.      | Background article               |
| TUBERCULOSIS OF THE LARYNX                                                                                                                                                                                                   | 1929 | British medical journal                                                            | Thomson, S.         | Background article               |
| Diagnostic Value of Direct and Cultural Examination of Laryngeal Secretion in Tuberculosis. / Importanza diagnostica della ricerca dei bacilli di Koch mediante l'esame diretto e culturale del secreto prelevato in laringe | 1936 | Rivista di Patologia e Clinica della Tuberculosi                                   | Bernabo-Silorata, A | Full text unavailable            |
| Negative Sputum and Pulmonary Tuberculosis                                                                                                                                                                                   | 1937 | Tubercle                                                                           | Davies, G. I.       | wrong study design               |
| The Value of Exact Sputum Examination (Laryngeal Swab Culture) in the Diagnosis and Management of Pulmonary Tuberculosis                                                                                                     | 1943 | Tubercle                                                                           | Munro-Ashman, D     | Wrong study design - case report |
| The incidence, treatment and prognosis of tuberculous laryngitis in pulmonary tuberculosis                                                                                                                                   | 1947 | The Medical press                                                                  | Lambert, V.         | Full text unavailable            |
| Relationship between pulmonary tuberculosis and tonsils                                                                                                                                                                      | 1948 | Minerva medica                                                                     | Puricelli, P. J.    | Full text unavailable            |
| Contribution to the study of so-called latent tuberculosis of the Waldeyer's lymph ring                                                                                                                                      | 1949 | Schweizerische medizinische Wochenschrift                                          | Langraf, F.         | Full text unavailable            |

|                                                                                                       |      |                                                                                             |                  |                       |
|-------------------------------------------------------------------------------------------------------|------|---------------------------------------------------------------------------------------------|------------------|-----------------------|
| Tuberculous laryngitis and tracheo bronchitis                                                         | 1949 | The Annals of otology, rhinology, and laryngology                                           | O'Keefe, J. J.   | Full text unavailable |
| Cervical lymph node tuberculosis and the tonsils                                                      | 1949 | Acta pathologica et microbiologica Scandinavica                                             | Pentti, M.       | Background article    |
| Tonsillar swab culture in lung tuberculosis                                                           | 1950 | Acta tuberculosea Scandinavica                                                              | Adler, H         | Full text unavailable |
| [Role of the nasopharynx complex in primary tuberculosis]                                             | 1950 | Revue de la tuberculose                                                                     | Couve, P         | Full text unavailable |
| [Comparative bacteriologic research on secretion withdrawn from the larynx in pulmonary tuberculosis] | 1950 | Archivio italiano di otologia, rinologia e laringologia                                     | Redoglia, F.     | Full text unavailable |
| An investigation of the occurrence of fungi in 250 laryngeal swabs from tuberculous patients          | 1953 | Acta Path. et Microb. Scandinavica                                                          | Reiersol, S.     | Wrong outcome         |
| Direct Trachal Lavage for Rapid Recovery of Mycobacterium tuberculosis from the Respiratory Tract     | 1956 | Brit. J. Tuberculosis                                                                       | Jones, J. S.     | Wrong outcome         |
| The Laryngeal Swab Method of diagnosing Pulmonary Tuberculosis                                        | 1956 | Monthly Bull. Ministry of Health & Pub. Health Lab. Service (directed by Med. Res. Council) | Thomas, C. H. H. | Wrong test type       |
| Isolation of mycobacteria from tonsils, nasopharyngeal secretions and lymph nodes in East Anglia      | 1970 | Tubercle                                                                                    | Stewart C, J     | Epidemiological study |

|                                                                                                                                                                        |      |                                              |                       |                                        |
|------------------------------------------------------------------------------------------------------------------------------------------------------------------------|------|----------------------------------------------|-----------------------|----------------------------------------|
| Sensitivity and specificity of PCR for detection of Mycobacterium tuberculosis: a blind comparison study among seven laboratories                                      | 1994 | Journal of clinical microbiology             | Noordhoek, G. T       | Wrong outcome - lab validation         |
| Identification of novel tuberculosis diagnostic biomarkers in plasma and saliva                                                                                        | 2016 | European Respiratory Journal                 | Jacobs, R             | Wrong test type biomarkers             |
| Suitability of saliva for Tuberculosis diagnosis: comparing with serum                                                                                                 | 2017 | BMC Infectious Diseases                      | Namuganga, Anna Ritah | Wrong outcome - lab validation         |
| An optimised saliva collection method to produce high-yield, high-quality RNA for translational research                                                               | 2020 | Plos One                                     | Sullivan, R           | Wrong outcome                          |
| Primary tuberculosis cutis orificialis; a different face of the same coin                                                                                              | 2021 | Idcases                                      | Ali, G. A.            | Wrong study type - case report         |
| Next-Generation Digital Biomarkers for Tuberculosis and Antibiotic Stewardship: Perspective on Novel Molecular Digital Biomarkers in Sweat, Saliva, and Exhaled Breath | 2021 | Journal of medical Internet research         | Brasier, Noe          | Biomarker study - wrong test not micro |
| Primary tonsillar tuberculosis                                                                                                                                         | 2021 | Klimik Dergisi                               | DaÅŸli, S             | Wrong study type - case report         |
| Tuberculosis in the head and neck: changing trends and age-related patterns                                                                                            | 2021 | Laryngoscope                                 | Gehrke, T.            | Wrong study type - case report         |
| New developments in tuberculosis diagnosis and treatment                                                                                                               | 2022 | Breathe                                      | Gil, C. M.            | Wrong study type - review              |
| Oro-facial tuberculosis - Is it still an enigmatic entity?                                                                                                             | 2021 | Indian Journal of Pathology and Microbiology | Gupta, L.             | Wrong study type - case report         |
| A rare association of tonsillar tuberculosis and lichen scrofulosorum                                                                                                  | 2021 | Egyptian Journal of Otolaryngology           | Harit, A.             | Wrong study type - case report         |



|                                                                                                                                                       |      |                                          |                     |                                                 |
|-------------------------------------------------------------------------------------------------------------------------------------------------------|------|------------------------------------------|---------------------|-------------------------------------------------|
| Dysphagia as the Presenting Symptom of Laryngeal Tuberculosis                                                                                         | 2021 | Cureus                                   | Kandah, E.          | Wrong study type - case report                  |
| Host-Based Biomarkers in Saliva for the Diagnosis of Pulmonary Tuberculosis in Children: A Mini-Review                                                | 2021 | Frontiers in Pediatrics                  | Khambati, N         | Biomarker study - wrong test not micro          |
| A narrative review of exploring potential salivary biomarkers in respiratory diseases: still on its way                                               | 2021 | Journal of Thoracic Disease              | Li, C. X.           | Biomarker study - wrong test not micro          |
| Cervical Tuberculosis Combined With Papillary Thyroid Carcinoma With Lateral Neck Metastasis                                                          |      | Ent-Ear Nose & Throat Journal            | Lin, H. Y.          | Wrong study type - case report                  |
| The history of tuberculosis of the larynx                                                                                                             | 2021 | Laryngo-Rhino-Otologie                   | Luckhaupt, H.       | Wrong study type - review                       |
| Suspected IgG4-related disease of the submandibular salivary gland and periorbital soft tissue in a man with latent tuberculosis                      | 2021 | Bmj Case Reports                         | McGreal-Bellone, A. | Wrong study type - case report                  |
| Primary tonsillar tuberculosis in a pediatric patient case report and literature review                                                               | 2021 | Medicine (Baltimore)                     | Moisa, S. M.        | Wrong study type - case report                  |
| Identification of novel salivary candidate protein biomarkers for tuberculosis diagnosis: a preliminary biomarker discovery study                     | 2021 | Tuberculosis                             | Mutavhatsindi, H.   | Biomarker study - wrong test not micro          |
| Determining the prevalence of rifampicin resistant tuberculosis in a tertiary care centre of north India by using rapid culture method and gene Xpert | 2021 | Journal of Pure and Applied Microbiology | Pokhriyal, B. C     | Wrong sample type - not upper respiratory tract |
| Laryngeal tuberculosis: a neglected diagnosis                                                                                                         | 2022 | Bmj Case Reports                         | Raj, R.             | Wrong study type - case report                  |
| Lingual primary tuberculosis mimicking malignancy                                                                                                     | 2021 | Annals of Medicine and Surgery           | Razem, B.           | Wrong study type - case report                  |
| Primary tuberculosis of the pyriform sinus: A case report                                                                                             | 2022 | Annals of Medicine and Surgery           | Touihmi, S.         | Wrong study type - case report                  |

|                                                                                               |      |                                                          |                  |                                   |
|-----------------------------------------------------------------------------------------------|------|----------------------------------------------------------|------------------|-----------------------------------|
| An Analysis of Xpert Test for Diagnosing Maxillofacial Tuberculosis                           |      | Journal of Maxillofacial & Oral Surgery                  | Tripathi, R.     | Wrong outcome - diagnosing URT TB |
| A look inside: oral sampling for detection of non-oral infectious diseases                    | 2021 | Journal of Clinical Microbiology                         | Valinetz, E. D.  | Wrong study type - review         |
| Life-Threatening Stridor due to Laryngeal Tuberculosis in the COVID-19 Era: Report of a Case  |      | Ent-Ear Nose & Throat Journal                            | Valjarevic, S.   | Wrong study type - case report    |
| Two cases of tuberculous retropharyngeal abscess in adults                                    | 2021 | The Journal of international medical research            | Xu, Xiaofeng     | Wrong study type - case report    |
| Case Report: Lingual Tuberculosis Revealed by a Cold Abscess                                  |      | Indian Journal of Otolaryngology and Head & Neck Surgery | Younes, H        | Wrong study type - case report    |
| Laryngeal and voice disorders in patients with pulmonary tuberculosis                         | 2021 | Iranian Journal of Otorhinolaryngology                   | Youssef, G       | Wrong outcome - diagnosing URT TB |
| The participation of tonsils in childhood tuberculosis                                        | 1947 | Revista chilena de pediatria                             | Pena Cereceda, J | Full text unavailable             |
| A Note on the Laryngeal Mirror Test for the Detection of Tubercle Bacilli                     | 1936 | Tubercle                                                 | Wood, W. B.      | Wrong study design - case report  |
| Tuberculosis, of Tonsils: Its Relation in Children with Tubercle Bacilli in Gastric Contents  | 1941 | American Review of Tuberculosis and Pulmonary Diseases   | Rosencrantz, E.  | Wrong test type histology         |
| On the occurrence and treatment of laryngeal tuberculosis in patients at the pulmonary clinic | 1945 | Duodecim; laaketieteellinen aikakauskirja                | Santalarti, V.   | Background article                |



| <b>Laryngeal swab</b> |                |           |                        |                             |                                                                                  |                                                     |         |                          |      |     |  |
|-----------------------|----------------|-----------|------------------------|-----------------------------|----------------------------------------------------------------------------------|-----------------------------------------------------|---------|--------------------------|------|-----|--|
| 1933                  | Kereszturi (1) | USA       | Diagnostics evaluation | Hospital                    | Throat swab                                                                      | Children with TB                                    | Culture | Gastric lavage culture   | 10   | NR  |  |
| 1937                  | Allodi (2)     | Italy     | Diagnostics evaluation | Clinic                      | Nichrome swab passed to larynx with 'fenestrated' cannula using a mirror.        | Clinic patients                                     | Culture | Gastric lavage culture   | 40   | NR  |  |
| 1941                  | Nassau (3)     | UK        | Diagnostics evaluation | Sanatorium                  | Sterilised angulated swab with cotton wool, passed to larynx and cough.          | Discharged 1940 – unable to expectorate             | Culture | Sputum culture           | 166  | NR  |  |
| 1948                  | Forbes (4)     | UK        | Diagnostics evaluation | Tuberculosis Hospital       | Sterilised angulated nichrome swab with cotton wool, passed to larynx and cough. | Inpatient sputum culture negative                   | Culture | Gastric lavage culture   | 100  | 100 |  |
| 1948                  | Hounslow (5)   | UK        | Diagnostics evaluation | Tuberculosis Hospital       | Sterilised angulated nichrome swab with cotton wool, passed to larynx and cough. | Hospital patients – unable to expectorate           | Culture | Gastric lavage culture   | 193  | NR  |  |
| 1950                  | Duggan(6)      | Canada    | Diagnostics evaluation | Sanatorium                  | Sterilised angulated swab with cotton wool, passed to larynx and cough.          | Inpatients and Outpatients both adults and children | Culture | Gastric lavage culture   | 100  | NR  |  |
| 1950                  | Renoux(7)      | France    | Diagnostics evaluation | Sanatorium                  | Sterilised angulated nichrome swab with cotton wool, passed to larynx and cough. | Sanatorium patients – sputum negative               | Culture | Gastric lavage culture   | 56   | NR  |  |
| 1951                  | Armstrong (8)  | Canada    | Diagnostics evaluation | Hospital                    | Sterilised angulated swab with cotton wool, passed to larynx and cough.          | Hospital patients on TB treatment                   | Culture | Gastric lavage culture   | 1024 | NR  |  |
| 1951                  | Szabo(9)       | Hungary   | Diagnostics evaluation | Not stated                  | Not described                                                                    | Smear negative TB patients                          | Culture | NR                       | 2174 | NR  |  |
| 1953                  | Chaves (10)    | USA       | Diagnostics evaluation | Chest clinic                | Sterilised angulated nichrome swab with cotton wool, passed to larynx and cough. | Clinic patients presumptive TB                      | Culture | Gastric lavage culture   | 1418 | NR  |  |
| 1954                  | Frostad (11)   | Norway    | Diagnostics evaluation | TB Hospital                 | Not described                                                                    | TB hospital patients                                | Culture | Gastric lavage culture   | 1500 | NR  |  |
| 1955                  | Campbell (12)  | Australia | Diagnostics evaluation | Chest clinic                | Sterilised angulated swab with cotton wool, passed to larynx and cough.          | Chest clinic – unable to expectorate                | Culture | Sputum culture           | 578  | NR  |  |
| 1955                  | Lees (13)      | UK        | Diagnostics evaluation | Mass screening/asymptomatic | Not described                                                                    | Mass screening admitted for swabs                   | Culture | Bronchial lavage culture | 144  | NR  |  |

|      |                 |                |                        |                                 |                                                                                           |                                                             |         |                        |      |    |  |
|------|-----------------|----------------|------------------------|---------------------------------|-------------------------------------------------------------------------------------------|-------------------------------------------------------------|---------|------------------------|------|----|--|
| 1955 | Lind (14)       | Sweden         | Diagnostics evaluation | Not stated                      | Stainless wire with calcium alginate advanced to glottis and cough                        | Patients with lesions on XR                                 | Culture | Gastric lavage culture | 121  | NR |  |
| 1955 | Wallace(15)     | UK             | Diagnostics evaluation | Hospital                        | Either cotton wool AC or alginate BDE                                                     | Inpatients on TB treatment                                  | Culture | Sputum culture         | 163  | NR |  |
| 1956 | Edwards (16)    | English        | Diagnostics evaluation | Chest clinic                    | Not described                                                                             | Outpatients – presumptive TB                                | Culture | NR                     | 1019 | NR |  |
| 1956 | Engbaek (17)    | Denmark        | Diagnostics evaluation | Hospital                        | Sterilised angulated swab with cotton wool, passed to larynx and cough.                   | Outpatients – unable to expectorate                         | Culture | Gastric lavage culture | 1231 | NR |  |
| 1956 | Tonge (18)      | Australia      | Diagnostics evaluation | Chest clinic                    | Sterilised angulated swab with cotton wool, passed to larynx and cough.                   | Outpatients – presumed and known TB, unable to expectorate  | Culture | Gastric lavage culture | 465  | NR |  |
| 1962 | Hsing (19)      | Taiwan         | Diagnostics evaluation | Hospital                        | Sterilised angulated swab with cotton wool, passed to larynx and cough.                   | Hospital patients                                           | Culture | Gastric lavage culture | 1320 | NR |  |
| 1962 | Velu (20)       | India          | Diagnostics evaluation | Outpatient treatment study      | Sterilised angulated swab with cotton wool, passed to larynx and cough.                   | Outpatients – bacteriologically confirmed TB                | Culture | Sputum culture         | 2809 | NR |  |
| 1962 | Kertay(21)      | Germany        | Diagnostics evaluation | State TB institute              | Not described                                                                             | TB hospital patients treated for TB                         | Culture | Sputum culture         | 212  | NR |  |
| 1965 | Hauge (22)      | Norway         | Diagnostics evaluation | Hospital                        | Not described                                                                             | Hospital patients – PTB on XR and clinical                  | Culture | NR                     | 157  | NR |  |
| 1966 | Pechacek (23)   | Czech republic | Diagnostics evaluation | TB hospital                     | Not described                                                                             | TB hospital patients – referred as PTB some already treated | Culture | Sputum culture         | 525  | NR |  |
| 1968 | Lloyd (24)      | English        | Diagnostics evaluation | Hospital                        | Stainless steel wire, wet cotton wool, bent to angle                                      | Paediatric inpatients with PTB                              | Culture | Gastric lavage culture | 60   | NR |  |
| 1970 | Mankiewicz (25) | Canada         | Diagnostics evaluation | Screening/Contacts/Asymptomatic | Alginate wool sterilised angulated swab, into larynx and cough                            | Outpatients – unable to expectorate                         | Culture | NR                     | 1199 | NR |  |
| 1999 | Thakur (26)     | India          | Diagnostics evaluation | Hospital outpatients            | Sterilised angulated swab, passed to larynx and cough.                                    | Outpatients – children under 14 probable TB                 | Culture | NR                     | 51   | 33 |  |
| 1948 | Gilje(27)       | Norway         | Diagnostics evaluation | Sanitorium                      | Sterilised angulated swab with cotton wool, passed to larynx and cough (Laryngeal streak) | Inpatients – unable to expectorate                          | Culture | Gastric lavage culture | 400  | NR |  |

|                         |               |              |                        |                     |                                                                                           |             |                                     |                       |                          |     |     |     |
|-------------------------|---------------|--------------|------------------------|---------------------|-------------------------------------------------------------------------------------------|-------------|-------------------------------------|-----------------------|--------------------------|-----|-----|-----|
| 1950                    | Lundar (28)   | Norway       | Diagnostics evaluation | Sanitorium          | Sterilised angulated swab with cotton wool, passed to larynx and cough (Laryngeal streak) |             | Inpatients – unable to expectorate  | Culture               | Gastric lavage culture   | 304 | NR  |     |
| 1951                    | Gilje(29)     | Norway       | Diagnostics evaluation | Sanitorium          | Sterilised angulated swab with cotton wool, passed to larynx and cough (Laryngeal streak) |             | Inpatients – unable to expectorate  | Culture               | Gastric lavage culture   | 863 | NR  |     |
| 1952                    | Roald (30)    | Norway       | Diagnostics evaluation | Sanitorium          | Sterilised angulated swab with cotton wool, passed to larynx and cough (Laryngeal streak) |             | Inpatients                          | Culture               | Gastric lavage culture   | 483 | NR  |     |
| 1952                    | Smedsrud (31) | Norway       | Diagnostics evaluation | Sanitorium          | Sterilised angulated swab with cotton wool, passed to larynx and cough (Laryngeal streak) |             | Inpatients                          | Culture               | Sputum culture           | 71  | NR  |     |
| 1953                    | Laes (32)     | Finland      | Diagnostics evaluation | Sanitorium          | Sterilised angulated swab with cotton wool, passed to larynx and cough (Laryngeal streak) |             | Inpatients – negative Ziehl-Nielson | Culture               | Gastric lavage culture   | 232 | NR  |     |
| Nasopharyngeal aspirate |               |              |                        |                     |                                                                                           |             |                                     |                       |                          |     |     |     |
| 1998                    | Franchi (33)  | Peru         | Diagnostic evaluation  | Hospital            | Feeding catheter                                                                          | Oropharynx  | Children presumptive TB             | Culture/PCR           | Gastric aspirate culture | 64  | NR  | 0   |
| 2007                    | Owens (34)    | Uganda       | Diagnostic evaluation  | Hospital            | Graduated suction catheter                                                                | Oropharynx  | Children presumptive TB             | Culture               | Induced sputum culture   | 94  | 57  | 44  |
| 2018                    | Cakir (35)    | Turkey       | Diagnostic evaluation  | Hospital            | Suction catheter                                                                          | Oropharynx  | Children presumptive TB             | Culture               | Gastric aspirate culture | 40  | 18  | NR  |
| 2012                    | Zar (36)      | South Africa | Diagnostic evaluation  | Hospital            | Sterile catheter with mucus trap                                                          | Nasopharynx | Children presumptive TB             | Culture/Xpert MTB/RIF | Induced sputum culture   | 535 | NR  | 117 |
| 2013                    | Zar (37)      | South Africa | Diagnostic evaluation  | Primary care clinic | Sterile catheter with mucus trap                                                          | Nasopharynx | Children presumptive TB             | Xpert MTB/RIF         | Induced sputum culture   | 384 | 181 | 31  |
| 2018                    | Hanrahan (38) | South Africa | Diagnostic evaluation  | Primary care clinic | Fasted 2 hours sterile catheter and mucus trap                                            | Nasopharynx | Children presumptive TB             | Culture/Xpert         | Induced sputum culture   | 105 | 63  | 21  |

|           |                 |                 |                                   |                          |                                                           |                            |                                         |                             |                                        |     |     |    |
|-----------|-----------------|-----------------|-----------------------------------|--------------------------|-----------------------------------------------------------|----------------------------|-----------------------------------------|-----------------------------|----------------------------------------|-----|-----|----|
|           |                 |                 |                                   |                          |                                                           |                            |                                         | MTB/<br>RIF                 |                                        |     |     |    |
| 2019      | Zar (39)        | South Africa    | Diagnostic evaluation             | Hospital                 | Sterile catheter with mucus trap                          | Nasopharynx                | Hospitalised presumptive PTB            | Xpert Ultra                 | Induced sputum culture                 | 195 | NR  | 32 |
| 2021      | Song (40)       | Kenya           | Cross sectional                   | Inpatient and Outpatient | French tubing and mucus trap                              | Nasopharynx                | Children presumptive TB                 | Xpert MTB/<br>RIF /<br>MGIT | Gastric aspirate<br>MGIT               | 294 | 149 | 73 |
| 2020      | Osorio (41)     | Mozambique      | Retrospective cross-sectional     | Hospital                 | Not stated                                                | Nasopharynx                | Children with severe acute malnutrition | Xpert MTB/<br>RIF /<br>MGIT | NR                                     | 45  | 24  | 10 |
| 2009      | Al-Aghbari (42) | Yemen           | Cohort                            | Hospital                 | Aspiration via a mucus trap connected to a suction device | Nasopharynx                | Children suspected TB                   | Culture                     | n/a                                    | 213 | NR  | NR |
| Oral swab |                 |                 |                                   |                          |                                                           |                            |                                         |                             |                                        |     |     |    |
| 2014      | Wood (43)       | South East Asia | Conference abstract               | NR                       | NR                                                        | NR                         | NR                                      | NR                          | NR                                     | 54  | NR  | NR |
| 2015      | Wood (44)       | South Africa    | Case control                      | TB clinic                | Omniswab                                                  | Inside of cheek 10 seconds | TB clinic patients                      | PCR                         | Sputum<br>Xpert<br>MTB/<br>RIF         | 20  | 8   | 0  |
| 2019      | Luabeya (45)    | South Africa    | Case control                      | TB Clinic                | Omniswab x 3,<br>Puritan Purflock<br>Ultra x 1 cheek      | Tongue swabs               | TB clinic patients                      | PCR                         | Sputum<br>Xpert<br>MTB/<br>RIF         | 130 | NR  | NR |
| 2019      | Mesman (46)     | Peru            | Case control                      | TB clinic                | Omniswab in lysis buffer,<br>Omniswab in PBS, FTA card    | Cheek                      | TB clinic patients                      | Xpert<br>MTB/<br>RIF        | Sputum<br>MGIT                         | 33  | NR  | NR |
| 2019      | Nicol (47)      | South Africa    | Prospective diagnostic evaluation | Hospital                 | Omniswab/Puritan Purflock                                 | Cheek (right and left)     | Presumptive pulmonary TB                | PCR                         | Induced sputum<br>Xpert<br>MTB/<br>RIF | 165 | 78  | 18 |

|      |                  |              |                                   |                            |                                                          |                                  |                                                               |                                           |                                 |     |     |    |
|------|------------------|--------------|-----------------------------------|----------------------------|----------------------------------------------------------|----------------------------------|---------------------------------------------------------------|-------------------------------------------|---------------------------------|-----|-----|----|
| 2020 | Flores (48)      | Peru         | Prospective diagnostic evaluation | Not stated                 | Omniswab in sterile lysis buffer or EasiCollect FTA card | Inside of both cheeks 10 seconds | Presumptive pulmonary TB                                      | PCR                                       | Bacteriologically confirmed     | 288 | NR  | 0  |
| 2020 | Mesman (49)      | Peru         | Case control                      | Health centres             | Omniswab, Easicollect FTA card                           | Inside of each cheek 10 seconds  | Culture confirmed TB                                          | PCR                                       | Sputum culture                  | 123 | 82  | 4  |
| 2020 | Molina-Moya (50) | Moldova      | Cross sectional                   | Hospital                   | Primeswab                                                | Swab cheek 7-8 seconds           | Clinical diagnosis presumptive TB                             | PCR                                       | Sputum culture                  | 266 | 157 | NR |
| 2020 | Lima (51)        | Brazil       | Case control                      | Prison                     | Not stated                                               | Tongue 10 seconds                | Sputum Xpert positive                                         | Xpert Ultra                               | Sputum Xpert Ultra              | 128 | NR  | NR |
| 2021 | Ealand (52)      | South Africa | Case control                      | Hospital                   | Copan swab                                               | Tongue 6-8 seconds               | Young children less than equal 5 clinically diagnosed with TB | Culture, Auramine/spogliotyping.M TBC DNA | Gastric aspirate culture /Xpert | 35  | 25  | 6  |
| 2021 | Song (53)        | China        | Prospective diagnostic evaluation | TB Hospital                | Swab                                                     | Dorsum tongue 7-8 times          | > 16 years symptoms suggestive pulmonary TB                   | TB-LAMP                                   | MGIT/Xpert MTB/RIF              | 101 | 69  | 0  |
| 2021 | Wood (54)        | Uganda       | Prospective diagnostic evaluation | TB Hospital and Outpatient | Copan FLOQSwab                                           | Front 2/3 tongue 15-20seconds    | Presumptive TB                                                | qPCR/Culture                              | Sputum culture /Xpert Ultra     | 103 | NR  | NR |
| 2022 | LaCourse (55)    | Kenya        | Cross-sectional                   | Outpatient Clinic          | OmniSwab                                                 | Left and Right buccal surface    | Presumptive TB                                                | qPCR                                      | Sputum culture /Xpert MTB/RIF   | 100 | 52  | 54 |
| 2022 | Andama (56)      | Uganda       | Cross-sectional                   | Outpatient Clinic          | COPAN FLOQswab                                           | 2 tongue swabs                   | Adults cough for greater than 2 weeks                         | Xpert Ultra                               | Xpert Ultra sputum              | 183 | 107 | 58 |
| 2022 | Chang (57)       | Uganda       | Cohort                            | Outpatient Clinic          | COPAN FLOQswab                                           | 15 sec dorsum of tongue          | Symptoms of respiratory illness                               | Metagenomic                               | n/a                             | 42  | NR  | NR |



|                   |                |                    |                                   |                   |                             |                                      |                                    |                  |                                  |     |     |     |
|-------------------|----------------|--------------------|-----------------------------------|-------------------|-----------------------------|--------------------------------------|------------------------------------|------------------|----------------------------------|-----|-----|-----|
|                   |                |                    |                                   |                   |                             |                                      |                                    | sequencing assay |                                  |     |     |     |
| 2022              | Kang (58)      | Republic of Korea  | Prospective diagnostic evaluation | Hospital          | OMNIgene.ORA L OMR-110 kit  | Palate, gum line and tongue dorsum   | Clinically suspected of active PTB | SLIM assay       | Culture positive (sputum, BAL)   | 272 | 174 | 1   |
| 2022              | Shapiro (59)   | South Africa       | Prospective diagnostic evaluation | Hospital/Clinic   | COPAN FLOQswab              | Dorsum of tongue 15-20 seconds       | Adult over 16 with TB symptoms     | PCR              | Sputum Xpert Ultra/ Culture      | 131 | 72  | 120 |
| 2022              | Cox (60)       | South Africa       | Prospective diagnostic evaluation | Hospital          | Puriflock or COPAN FLOQswab | Swab tongue or inside of both cheeks | Children <15 presumptive PTB       | Xpert Ultra      | Induced sputum Xpert and culture | 291 | 158 | 57  |
| <b>Mouth wash</b> |                |                    |                                   |                   |                             |                                      |                                    |                  |                                  |     |     |     |
| 1955              | Rogers (61)    | USA                | Diagnostic evaluation             | Hospital          | Mouthwash                   | Pharynx                              | Proven or presumptive TB           | Culture          | Sputum culture                   | 43  | NR  | NR  |
| 1994              | Evans (62)     | UK                 | Case control                      | Outpatient clinic | Mouthwash                   | Pharynx                              | Active TB and controls             | Lysed rRNA PCR   | Sputum culture                   | 39  | NR  | NR  |
| 2009              | Davis (63)     | Uganda             | Diagnostic evaluation             | Hospital          | Mouthwash                   | Pharynx                              | Outpatients and inpatients         | PCR              | Sputum culture                   | 127 | NR  | 58  |
| <b>Nasal swab</b> |                |                    |                                   |                   |                             |                                      |                                    |                  |                                  |     |     |     |
| 1996              | Warndorff (64) | Malawi             | Case control                      | Hospital          | Cotton wool nasal swab      | Nose                                 | Inpatients and contacts            | PCR              | Sputum culture                   | 52  | NR  | NR  |
| <b>Saliva</b>     |                |                    |                                   |                   |                             |                                      |                                    |                  |                                  |     |     |     |
| 2013              | Shenai (65)    | South Africa/Korea | Diagnostic evaluation             | Hospital          | Salivette saliva collector  | Mouth                                | Adult PTB diagnosed patients       | Xpert MTB/RIF    | Sputum culture                   | 26  | NR  | 0   |

|              |               |         |                 |                   |                                         |                |                                        |               |                            |    |    |    |
|--------------|---------------|---------|-----------------|-------------------|-----------------------------------------|----------------|----------------------------------------|---------------|----------------------------|----|----|----|
| 2015         | Gonzalez (66) | Spain   | Case control    | Hospital          | Spitting method into sterile container  | Mouth          | Adult presumptive TB                   | Culture       | Sputum culture             | 32 | 21 | NR |
| 2022         | Byanyima (67) | Uganda  | Cohort          | Hospital          | Spitting method into sterile container  | Mouth          | Sputum Xpert Ultra positive for TB     | Xpert Ultra   | Sputum culture             | 82 | 50 | 18 |
| 2022         | Hansen (68)   | Germany | Case control    | n/a               | NR                                      | Mouth          | Patients with TB                       | qPCR          | NR                         | 17 | NR | NR |
| <b>Other</b> |               |         |                 |                   |                                         |                |                                        |               |                            |    |    |    |
| 2003         | Eguchi (69)   | Japan   | Case control    | Hospital          | Unstimulated saliva in test tube        | Mouth          | Patients with TB                       | Culture/PCR   | Culture                    | 75 | 67 | 0  |
| 2012         | Palakuru (70) | India   | Case control    | Outpatient clinic | Unstimulated saliva in sterile vial     | Mouth          | Pulmonary TB                           | PCR           | Acid-fast bacilli positive | 25 | NR | 0  |
| 2016         | Balcells (71) | Chile   | Cross sectional | Outpatient clinic | Bilateral nasopharyngeal COPAN FLOQswab | Nasopharyngeal | Adult contacts of smear positive cases | Xpert MTB/TIF | N/A                        | 77 | 34 | NR |

**NR:** Not reported

S Table S6:

Full data table to show included reports and analysis of laryngeal swabs as sample type (all index and reference samples cultures full methodology in table S3).

| Study                          | Comparison     | TP | FN | FP | TN | Sens    | Spec     | Sens_Percentage | Spec_Percentage | LCI_sens | UCI_sens | LCI_spec | UCI_spec |
|--------------------------------|----------------|----|----|----|----|---------|----------|-----------------|-----------------|----------|----------|----------|----------|
| 1941_Nassau_Discharged<br>1940 | Sputum culture | 28 | 35 | 35 | 68 | 0.44444 | 0.660194 | 44.44444        | 66.01942        | 0.321741 | 0.567148 | 0.568722 | 0.751666 |

|                                                                                 |                |     |     |     |      |                  |              |              |              |              |              |              |              |
|---------------------------------------------------------------------------------|----------------|-----|-----|-----|------|------------------|--------------|--------------|--------------|--------------|--------------|--------------|--------------|
| 1941_Nassau<br>_Inpatient<br>1940                                               | Sputum culture | 20  | 18  | 38  | 31   | 0.52<br>631<br>6 | 0.449<br>275 | 52.6315<br>8 | 44.9275<br>4 | 0.36755<br>9 | 0.68507<br>2 | 0.33190<br>6 | 0.56664<br>5 |
| 1948_Forbes<br>_Inpatient                                                       | Gastric lavage | 22  | 20  | 10  | 48   | 0.52<br>381      | 0.827<br>586 | 52.3809<br>5 | 82.7586<br>2 | 0.37276<br>4 | 0.67485<br>5 | 0.73037<br>1 | 0.92480<br>2 |
| 1948_Forbes<br>_Outpatient                                                      | Gastric lavage | 5   | 6   | 8   | 82   | 0.45<br>454<br>5 | 0.911<br>111 | 45.4545<br>5 | 91.1111<br>1 | 0.16028<br>8 | 0.74880<br>3 | 0.85231<br>6 | 0.96990<br>7 |
| 1948_Forbes<br>_Mass<br>radiography                                             | Sputum culture | 13  | 15  | 3   | 65   | 0.46<br>428<br>6 | 0.955<br>882 | 46.4285<br>7 | 95.5882<br>4 | 0.27955<br>6 | 0.64901<br>5 | 0.90707<br>2 | 1            |
| 1948_Hounsl<br>ow_Hospital<br>patients                                          | Gastric lavage | 18  | 14  | 21  | 140  | 0.56<br>25       | 0.869<br>565 | 56.25        | 86.9565<br>2 | 0.39061<br>8 | 0.73438<br>2 | 0.81754<br>3 | 0.92158<br>8 |
| 1950_Dugga<br>n_Inpatients<br>and<br>Outpatients<br>both adults<br>and children | Gastric lavage | 27  | 3   | 5   | 65   | 0.9              | 0.928<br>571 | 90           | 92.8571<br>4 | 0.79264<br>6 | 1            | 0.86823<br>9 | 0.98890<br>4 |
| 1950_Renou<br>x_Sanatori<br>um patients                                         | Gastric lavage | 19  | 4   | 4   | 29   | 0.82<br>608<br>7 | 0.878<br>788 | 82.6087      | 87.8787<br>9 | 0.67118      | 0.98099<br>4 | 0.76743<br>2 | 0.99014<br>4 |
| 1951_Armstr<br>ong_Hospital<br>patients                                         | Gastric lavage | 84  | 15  | 105 | 763  | 0.84<br>848<br>5 | 0.879<br>032 | 84.8484<br>8 | 87.9032<br>3 | 0.77785<br>5 | 0.91911<br>5 | 0.85733<br>9 | 0.90072<br>6 |
| 1953_Chaves<br>_Clinic<br>patients                                              | Gastric lavage | 115 | 72  | 20  | 1211 | 0.61<br>497<br>3 | 0.983<br>753 | 61.4973<br>3 | 98.3753      | 0.54522<br>9 | 0.68471<br>8 | 0.97669<br>1 | 0.99081<br>6 |
| 1954_Frosta<br>d_TB                                                             | Gastric lavage | 91  | 104 | 88  | 1217 | 0.46<br>666<br>7 | 0.932<br>567 | 46.6666<br>7 | 93.2567      | 0.39664<br>4 | 0.53669      | 0.91896<br>1 | 0.94617<br>3 |

|                                              |                                   |     |    |    |      |                  |              |              |              |              |              |              |              |
|----------------------------------------------|-----------------------------------|-----|----|----|------|------------------|--------------|--------------|--------------|--------------|--------------|--------------|--------------|
| hospital patients                            |                                   |     |    |    |      |                  |              |              |              |              |              |              |              |
| 1955_Lind_P<br>patients with<br>lesions      | Gastric lavage                    | 11  | 13 | 2  | 95   | 0.45<br>833<br>3 | 0.979<br>381 | 45.8333<br>3 | 97.9381<br>4 | 0.25898<br>7 | 0.65767<br>9 | 0.95110<br>2 | 1            |
| 1955_Lind_P<br>patients with<br>lesions      | Sputum culture                    | 26  | 56 | 8  | 293  | 0.31<br>707<br>3 | 0.973<br>422 | 31.7073<br>2 | 97.3421<br>9 | 0.21635<br>3 | 0.41779<br>3 | 0.95525<br>1 | 0.99159<br>3 |
| 1955_Wallac<br>e_Inpatients                  | Sputum culture                    | 37  | 14 | 13 | 73   | 0.72<br>549      | 0.848<br>837 | 72.5490<br>2 | 84.8837<br>2 | 0.60301      | 0.84797      | 0.77312<br>9 | 0.92454<br>5 |
| 1956_Engba<br>ek_Outpatien<br>ts             | Gastric lavage                    | 38  | 76 | 10 | 1107 | 0.33<br>333<br>3 | 0.991<br>047 | 33.3333<br>3 | 99.1047<br>4 | 0.24679<br>7 | 0.41986<br>9 | 0.98552<br>3 | 0.99657<br>1 |
| 1955_Tonge<br>_Outpatients                   | Gastric lavage                    | 52  | 78 | 2  | 333  | 0.4              | 0.994<br>03  | 40           | 99.4029<br>9 | 0.31578<br>5 | 0.48421<br>5 | 0.98578      | 1            |
| 1962_Hsing_<br>Hospital<br>patients          | Gastric lavage                    | 264 | 90 | 46 | 907  | 0.74<br>576<br>3 | 0.951<br>731 | 74.5762<br>7 | 95.1731<br>4 | 0.70040<br>3 | 0.79112<br>3 | 0.93812<br>3 | 0.96534      |
| 1966_Pechac<br>ek_TB<br>hospital<br>patients | Homogenised<br>24 hours<br>sputum | 24  | 39 | 0  | 235  | 0.38<br>095<br>2 | 1            | 38.0952<br>4 | 100          | 0.26103<br>5 | 0.50087      | 1            | 1            |
| 1966_Pechac<br>ek_TB<br>hospital<br>patients | Homogenised<br>24 hours<br>sputum | 28  | 29 | 0  | 170  | 0.49<br>122<br>8 | 1            | 49.1228<br>1 | 100          | 0.36144<br>4 | 0.62101<br>2 | 1            | 1            |
| 1968_Lloyd,<br>A. V.<br>C._Inpatients        | Gastric lavage                    | 12  | 5  | 26 | 17   | 0.70<br>588<br>2 | 0.395<br>349 | 70.5882<br>4 | 39.5348<br>8 | 0.48928<br>2 | 0.92248<br>2 | 0.24921      | 0.54148<br>7 |
| 1950_Lundar<br>_Inpatients                   | Gastric lavage                    | 38  | 34 | 16 | 216  | 0.52<br>777<br>8 | 0.931<br>034 | 52.7777<br>8 | 93.1034<br>5 | 0.41246<br>2 | 0.64309<br>4 | 0.89842<br>7 | 0.96364<br>1 |

|                           |                |    |    |    |     |          |          |          |          |          |          |          |         |
|---------------------------|----------------|----|----|----|-----|----------|----------|----------|----------|----------|----------|----------|---------|
| 1952_Roald_Inpatients     | Gastric lavage | 96 | 37 | 52 | 298 | 0.721805 | 0.851429 | 72.18045 | 85.14286 | 0.645647 | 0.797962 | 0.814167 | 0.88869 |
| 1952_Smeds_rud_Inpatients | Sputum culture | 34 | 21 | 2  | 14  | 0.618182 | 0.875    | 61.81818 | 87.5     | 0.489783 | 0.746581 | 0.712948 | 1       |

### S7: Laryngeal swab reference standard meta-regression

A meta-regression was performed to model the difference in reference test (sputum culture or gastric lavage culture) as covariates. Firstly a separate meta-analysis was run for each reference test (Table S6), then a likelihood ratio test compared a further model (A) run without covariates to model (B) with equal variance and a covariate (A: without covariate sensitivity 59.2% [95% CI 51.2-66.7], specificity 91.8% [95% CI 86.0-95.4]), and there was statistical evidence (Chi2 = 10.277, 2 df, P = 0.006) of association of reference test type with sensitivity and/or specificity of laryngeal swabs. Two further models were then analysed one comparing sensitivity with reference sample as a covariate (C) and one of specificity (D). These showed there was a statistical significant difference in the modelled specificity but no difference in sensitivity (likelihood ratio comparing model B and C: Chi2 = 0.097, 2 df, P = 0.755, model B and D: Chi2 = 13.477, P = 0.0002 [Table S6]). Lastly a model allowing for unequal variances (E) was run which again showed a significant effect of the specificity of reference sample types (Fixed effect specificity gastric lavage Pr  $1.68 \times 10^{-14}$ , specificity sputum Pr 0.0015).

Table S7 to show model outputs when comparing gastric lavage and sputum culture when used as a reference test for laryngeal swabs.

| Model                                                    | Gastric lavage          |                         | Sputum                  |                         |
|----------------------------------------------------------|-------------------------|-------------------------|-------------------------|-------------------------|
|                                                          | Sensitivity<br>(95% CI) | Specificity<br>(95% CI) | Sensitivity<br>(95% CI) | Specificity<br>(95% CI) |
| Separate meta-analysis for each test                     | 62.6 (52.9 to 71.4)     | 93.4 (87.8 to 96.5)     | 51.4 (40.1 to 62.6)     | 85.7 (66.5 to 94.8)     |
| Test comparison assuming equal variances (model B)       | 62.4 (53.4 to 70.6)     | 93.4 (87.8 to 96.6)     | 51.6 (37.4 to 65.5)     | 85.5 (66.5 to 94.6)     |
| Model comparing sensitivity (C)                          |                         | 94.3 (85.6 – 97.9)      |                         | 78.9 (43.0 – 94.9)      |
| Model comparing specificity (D)                          | 61.9 (53.5-69.6)        |                         | 47.0 (34.0 – 60.4)      |                         |
| Test comparison allowing for unequal variances (model E) | 62.6 (52.9 to 71.4)     | 93.4 (87.8 to 96.5)     | 51.4 (40.1 to 62.6)     | 85.7 (66.5 to 94.8)     |

Supplementary table S8:

Data table to show analysis of reports of NPA as sample type

| Study / Index test analysis | Comparison (culture)  | T<br>P | F<br>N | F<br>P | T<br>N | Sens     | Spec     | Sens_Percentage | Spec_Percentage | LCI_sens | UCI_sens | LCI_spec | UCI_spec |
|-----------------------------|-----------------------|--------|--------|--------|--------|----------|----------|-----------------|-----------------|----------|----------|----------|----------|
| 1998_Franchi/Culture        | Gastric aspirate      | 17     | 7      | 2      | 38     | 0.708333 | 0.95     | 70.83333        | 95              | 0.526484 | 0.890183 | 0.882458 | 1        |
| 1998_Franchi/PCR            | Gastric aspirate      | 13     | 4      | 5      | 42     | 0.764706 | 0.893617 | 76.47059        | 89.3617         | 0.563062 | 0.966349 | 0.805468 | 0.981766 |
| 2007_Owens/Culture          | Induced sputum        | 16     | 3      | 5      | 64     | 0.842105 | 0.927536 | 84.21053        | 92.75362        | 0.678142 | 1        | 0.866364 | 0.988709 |
| 2012_Zar/Culture            | Induced sputum        | 61     | 23     | 0      | 451    | 0.72619  | 1        | 72.61905        | 100             | 0.630831 | 0.82155  | 1        | 1        |
| 2013_Zar/Xpert MTB/RIF      | Induced sputum        | 9      | 21     | 8      | 346    | 0.3      | 0.977401 | 30              | 97.74011        | 0.136015 | 0.463985 | 0.961919 | 0.992883 |
| 2019_Hanrahan/Xpert MTB/RIF | Induced sputum        | 0      | 2      | 2      | 90     | 0        | 0.978261 | 0               | 97.82609        | 0        | 0        | 0.948461 | 1        |
| 2019_Hanrahan/Culture       | Induced sputum        | 0      | 0      | 1      | 93     | NA       | 0.989362 | NA              | 98.93617        | NA       | NA       | 0.968622 | 1        |
| 2019_Zar/Ultra              | Induced sputum        | 21     | 19     | 5      | 150    | 0.525    | 0.967742 | 52.5            | 96.77419        | 0.370242 | 0.679758 | 0.939926 | 0.995558 |
| 2021_Song/Xpert MTB/RIF     | Gastric aspirate MGIT | 14     | 8      | 3      | 269    | 0.636364 | 0.988971 | 63.63636        | 98.89706        | 0.435347 | 0.83738  | 0.976559 | 1        |
| 2021_Song/MGIT              | Gastric aspirate MGIT | 18     | 4      | 4      | 268    | 0.818182 | 0.985294 | 81.81818        | 98.52941        | 0.65701  | 0.979353 | 0.970989 | 0.9996   |

#### S9: Nasopharyngeal reference standard meta-regression

A meta-regression was performed to model the difference in reference test (induced sputum culture or gastric aspirate culture) as covariates.

Firstly a separate meta-analysis was run for each reference test (Table S8), then a likelihood ratio test compared a further model (A) run without covariates to model (B) with equal variance and a covariate (A: without covariate sensitivity 73.2% [95% CI 57.7-84.5], specificity 92.0% [95%

CI 84.1-96.1]), and there was statistical evidence (Chi2 = 10.354, 2 df, P = 0.006) of association of reference test type with sensitivity and/or specificity of nasopharyngeal aspirates. Two further models were then analysed one comparing sensitivity with reference sample as a covariate (C) and one of specificity (D). These showed there was a statistical significant difference in the modelled specificity but no difference in sensitivity (likelihood ratio comparing model B and C: Chi2 = 0.82, 2 df, P = 0.364, model B and D: Chi2 = 9.42, P = 0.002 [Table S8]). Lastly a model allowing for unequal variances (E) was run which again showed a significant effect of the specificity of reference sample types (Fixed effect specificity gastric lavage Pr 6.18 x 10<sup>-10</sup>, specificity sputum Pr 3.29 x 10<sup>-15</sup>).

Table S9: to show model outputs when comparing gastric aspirate and induced sputum culture when used as a reference test for nasopharyngeal aspirates.

| Model                                              | Gastric lavage          |                         | Sputum                  |                         |
|----------------------------------------------------|-------------------------|-------------------------|-------------------------|-------------------------|
|                                                    | Sensitivity<br>(95% CI) | Specificity<br>(95% CI) | Sensitivity<br>(95% CI) | Specificity<br>(95% CI) |
| Separate meta-analysis for each test               | 73.2 (57.7 – 84.5)      | 92.0 (84.1-96.1)        | 56.3 (34.1-76.2)        | 98.4 (95.6-99.4)        |
| Test comparison assuming equal variances (model B) | 73.9 (45.8-90.5)        | 93.4 (33.3 – 99.8)      | 56.8 (38.8 – 73.1)      | 98.8 (91.8 – 99.8)      |
| Model comparing sensitivity (C)                    |                         | 89.1(19.8 – 99.6)       |                         | 99.0 (93.1-99.9)        |



|                                                          |                     |                    |                    |                    |
|----------------------------------------------------------|---------------------|--------------------|--------------------|--------------------|
| Model comparing specificity (D)                          | 77.4 (46.2 – 93.2)  |                    | 55.8 (35.7 – 74.1) |                    |
| Test comparison allowing for unequal variances (model E) | 73.2 (57.7. – 84.5) | 92.0 (84.1 – 96.1) | 56.3 (34.1 – 76.2) | 98.4 (95.7 – 99.4) |

Supplementary table S10:

Data table to show analysis of reports of NPA as sample type using clinical diagnosis as a reference test:

| Study / Index test analysis | Clinical_comparison | Probable.PTB | True.positive.PTB | Definite.PTB | True.positive.DTB | No.TB | Combined.True.positive | FN | FP | TN | Sens     | Spec | Sens_Percentage | Spec_Percentage | SE_sens  | LCI_sens | UCI_sens | SE_spec | LCI_spec | UCI_spec |
|-----------------------------|---------------------|--------------|-------------------|--------------|-------------------|-------|------------------------|----|----|----|----------|------|-----------------|-----------------|----------|----------|----------|---------|----------|----------|
| 2007_Owens/Culture          | Probable PTB        | 94           | 21                | 0            | 0                 | 0     | 21                     | 73 | 0  | 0  | 0.223404 | NA   | 22.34043        | NA              | 0.042961 | 0.132    | 0.30769  | NA      | NA       | NA       |
| 2018_Cakir/Culture          | Probable PTB        | 40           | 5                 | 0            | 0                 | 0     | 5                      | 35 | 0  | 0  | 0.125    | NA   | 12.5            | NA              | 0.052291 | 0.029    | 0.27491  | NA      | NA       | NA       |

|                                        |                                                            |     |    |    |    |             |    |             |   |                          |                            |        |              |              |                      |                      |                      |                      |                 |        |
|----------------------------------------|------------------------------------------------------------|-----|----|----|----|-------------|----|-------------|---|--------------------------|----------------------------|--------|--------------|--------------|----------------------|----------------------|----------------------|----------------------|-----------------|--------|
| 2012_Zar/<br>Culture                   | Probable and<br>definite =<br>positive, not =<br>negative. | 255 | 0  | 87 | 61 | 1<br>9<br>3 | 61 | 2<br>8<br>1 | 0 | 1<br>9<br>3              | 0.<br>17<br>83<br>63       | 1      | 17.8<br>3626 | 100          | 0.<br>02<br>07       | 0.1<br>37<br>79      | 0.2<br>18<br>93<br>5 | 0                    | 1               | 1      |
| 2012_Zar/<br>Xpert<br>MTB/RIF          | Probable and<br>definite =<br>positive, not =<br>negative. | 255 | 7  | 87 | 49 | 1<br>9<br>3 | 56 | 2<br>8<br>6 | 1 | 1<br>9<br>2<br>37<br>43  | 0.<br>16<br>99<br>48<br>19 | 0.     | 16.3<br>7427 | 99.4<br>8187 | 0.<br>02<br>00<br>1  | 0.1<br>24<br>52<br>4 | 0.2<br>02<br>96<br>1 | 0.<br>00<br>51<br>68 | 0.9<br>84<br>69 | 1      |
| 2013_Zar/<br>Xpert<br>MTB/RIF          | Probable and<br>definite =<br>positive, not =<br>negative. | 167 | 5  | 30 | 12 | 1<br>8<br>7 | 17 | 1<br>8<br>0 | 0 | 1<br>8<br>7<br>62<br>94  | 0.<br>08<br>62<br>94       | 1      | 8.62<br>9442 | 100          | 0.<br>02<br>00<br>06 | 0.0<br>47<br>08<br>3 | 0.1<br>25<br>50<br>6 | 0                    | 1               | 1      |
| 2019_Han<br>rahan/Xpe<br>rt<br>MTB/RIF | Confirmed,<br>unconfirmed,<br>not                          | 100 | 0  | 4  | 2  | 1<br>5      | 2  | 1<br>0<br>2 | 0 | 1<br>5<br>01<br>92<br>31 | 0.<br>01<br>92<br>31       | 1      | 1.92<br>3077 | 100          | 0.<br>01<br>34<br>67 | -<br>0.0<br>07<br>16 | 0.0<br>45<br>62<br>6 | 0                    | 1               | 1      |
| 2019_Han<br>rahan/Cult<br>ure          | Confirmed,<br>unconfirmed,<br>not                          | 100 | 0  | 4  | 1  | 1<br>5      | 1  | 1<br>0<br>3 | 0 | 1<br>5<br>00<br>96<br>15 | 0.<br>00<br>96<br>15       | 1      | 0.96<br>1538 | 100          | 0.<br>00<br>95<br>69 | -<br>0.0<br>09<br>14 | 0.0<br>28<br>37<br>1 | 0                    | 1               | 1      |
| 2019_Zar/<br>Ultra                     | Confirmed,<br>unconfirmed,<br>not                          | 104 | 5  | 40 | 21 | 5<br>1      | 26 | 1<br>1<br>8 | 0 | 5<br>1<br>05<br>56       | 0.<br>18<br>05<br>56       | 1      | 18.0<br>5556 | 100          | 0.<br>03<br>20<br>54 | 0.1<br>17<br>72<br>9 | 0.2<br>43<br>38<br>2 | 0                    | 1               | 1      |
| 2021_Son<br>g/Xpert<br>MTB/RIF         | Clinically<br>suspected                                    | 294 | 17 | 0  | 0  | 0           | 17 | 2<br>7<br>7 | 0 | 0                        | 0.<br>05<br>78<br>23       | N<br>A | 5.78<br>2313 | NA           | 0.<br>01<br>36<br>13 | 0.0<br>31<br>14<br>2 | 0.0<br>84<br>50<br>4 | N<br>A               | N<br>A          | N<br>A |
| 2021_Son<br>g/MGIT                     | Clinically<br>suspected                                    | 294 | 22 | 0  | 0  | 0           | 22 | 2<br>7<br>2 | 0 | 0                        | 0.<br>07<br>48<br>3        | N<br>A | 7.48<br>2993 | NA           | 0.<br>01<br>53<br>45 | 0.0<br>44<br>75<br>3 | 0.1<br>04<br>90<br>7 | N<br>A               | N<br>A          | N<br>A |

|                                  |                         |    |   |   |   |        |   |        |   |        |                      |   |              |     |                      |                      |                      |   |   |   |
|----------------------------------|-------------------------|----|---|---|---|--------|---|--------|---|--------|----------------------|---|--------------|-----|----------------------|----------------------|----------------------|---|---|---|
| 2020_Oso<br>rio/Xpert<br>MTB/RIF | Clinically<br>suspected | 17 | 0 | 0 | 0 | 2<br>8 | 0 | 1<br>7 | 0 | 2<br>8 | 0                    | 1 | 0            | 100 | 0                    | 0                    | 0                    | 0 | 1 | 1 |
| 2020_Oso<br>rio/MGIT             | Clinically<br>suspected | 17 | 4 | 0 | 0 | 2<br>8 | 4 | 1<br>3 | 0 | 2<br>8 | 0.<br>23<br>52<br>94 | 1 | 23.5<br>2941 | 100 | 0.<br>10<br>28<br>79 | 0.0<br>33<br>65<br>1 | 0.4<br>36<br>93<br>8 | 0 | 1 | 1 |

Supplementary table S11:

Data table to show analysis of reports of oral swabs as sample type.

| Study /<br>Index test<br>analysis | Participants           | Comparison                                        | T<br>P | F<br>N | F<br>P | T<br>N      | Sen<br>s         | Spe<br>c         | Sens_<br>Percen<br>tage | Spec_<br>Percen<br>tage | SE<br>_se<br>ns  | LC<br>I_s<br>ens | UC<br>I_s<br>ens | SE<br>_sp<br>ec  | LC<br>I_s<br>pec | UC<br>I_s<br>pec |
|-----------------------------------|------------------------|---------------------------------------------------|--------|--------|--------|-------------|------------------|------------------|-------------------------|-------------------------|------------------|------------------|------------------|------------------|------------------|------------------|
| 2015_Woo<br>d/PCR                 | TB clinic patients     | GeneXpert<br>positive on<br>sputum                | 1<br>8 | 2      | 0      | 0           | 0.9              | NA               | 90                      | NA                      | 0.0<br>670<br>82 | 0.7<br>685<br>19 | 1                | NA               | NA               | NA               |
| 2019_Luab<br>eya/PCR              | TB clinic patients     | GeneXpert<br>MTB/RIF plus<br>MGIT                 | 4<br>9 | 1<br>0 | 6<br>0 | 6<br>5      | 0.8<br>305<br>08 | 0.9<br>154<br>93 | 83.050<br>85            | 91.549<br>3             | 0.0<br>488<br>45 | 0.7<br>347<br>72 | 0.9<br>262<br>45 | 0.0<br>330<br>1  | 0.8<br>507<br>93 | 0.9<br>801<br>92 |
| 2019_Mes<br>man/Xpert<br>TB/Rif   | TB clinic patients     | MGIT sputum<br>culture                            | 1<br>5 | 1<br>8 | 0      | 0           | 0.4<br>545<br>45 | NA               | 45.454<br>55            | NA                      | 0.0<br>866<br>78 | 0.2<br>846<br>56 | 0.6<br>244<br>35 | NA               | NA               | NA               |
| 2019_Nicol<br>/PCR                | Suspected pulmonary TB | IS Xpert MTB/Rif<br>or sputum culture<br>positive | 1<br>7 | 2<br>3 | 2<br>2 | 1<br>0<br>3 | 0.4<br>25        | 0.8<br>24        | 42.5                    | 82.4                    | 0.0<br>781<br>62 | 0.2<br>718<br>02 | 0.5<br>781<br>98 | 0.0<br>340<br>62 | 0.7<br>572<br>39 | 0.8<br>907<br>61 |

|                            |                                                               |                                    |    |    |    |        |          |          |          |          |          |          |         |          |          |          |
|----------------------------|---------------------------------------------------------------|------------------------------------|----|----|----|--------|----------|----------|----------|----------|----------|----------|---------|----------|----------|----------|
| 2020_Flores/PCR            | Suspected pulmonary TB                                        | Bacteriologically confirmed        | 59 | 15 | 52 | 0.2083 | 0.98106  | 20.8333  | 98.10606 | 0.0828   | 0.0458   | 0.3708   | 0.0083  | 0.9646   | 0.9975   |          |
| 2020_Mesman/PCR            | Culture confirmed TB                                          | Culture positive                   | 63 | 60 | 00 | 0.5121 | NA       | 51.21951 | NA       | 0.04507  | 0.4238   | 0.6005   | NA      | NA       | NA       |          |
| 2020_Molina-Moya/PCR       | Clinical diagnosis presumptive TB                             | MTBC culture                       | 29 | 51 | 38 | 14     | 0.3625   | 0.7956   | 36.25    | 79.56989 | 0.0537   | 0.2571   | 0.4678  | 0.0295   | 0.7377   | 0.8536   |
| 2021_Ealand/MTBC g DNA     | Young children less than equal 5 clinically diagnosed with TB | Gastric Aspirate culture/GeneXpert | 4  | 27 | 72 | 22     | 0.66667  | 0.7586   | 66.66667 | 75.86207 | 0.19245  | 0.2894   | 1       | 0.0794   | 0.6028   | 0.9143   |
| 2021_Ealand/Spogliotyping  |                                                               | Gastric Aspirate culture/GeneXpert | 2  | 42 | 17 | 17     | 0.33333  | 0.5862   | 33.33333 | 58.62069 | 0.19245  | -0.04387 | 0.7105  | 0.0914   | 0.4069   | 0.7654   |
| 2021_Ealand/Auramine smear |                                                               | Gastric Aspirate culture/GeneXpert | 3  | 30 | 29 | 99     | 0.510345 | 0.31034  | 50       | 31.03448 | 0.204124 | 0.099917 | 0.90083 | 0.085909 | 0.141963 | 0.478727 |
| 2021_Ealand/Culture        |                                                               | Gastric Aspirate culture/GeneXpert | 0  | 60 | 02 | 99     | 0        | 1        | 0        | 100      | 0        | 0        | 0       | 0        | 1        | 1        |
| 2021_Song/TB-LAMP          | > 16 years symptoms suggestive pulmonary TB                   | MGIT                               | 33 | 58 | 85 | 55     | 0.868421 | 0.8730   | 86.84211 | 87.30159 | 0.054836 | 0.760942 | 0.9759  | 0.041948 | 0.790797 | 0.955235 |
| 2021_Wood/qPCR             | Suspected TB                                                  | Culture                            | 43 | 42 | 14 | 44     | 0.91489  | 0.78571  | 91.48936 | 78.57143 | 0.040702 | 0.835117 | 0.99467 | 0.054832 | 0.678243 | 0.893185 |
| 2021_Wood/Culture          | Suspected TB                                                  | Sputum culture                     | 82 | 50 | 09 | 912    | 0.6212   | 1        | 62.12121 | 100      | 0.042221 | 0.5384   | 0.7039  | 0        | 1        | 1        |

|                         |                                       |                                    |        |        |        |             |                  |                  |              |              |                  |                  |                  |                  |                  |                  |
|-------------------------|---------------------------------------|------------------------------------|--------|--------|--------|-------------|------------------|------------------|--------------|--------------|------------------|------------------|------------------|------------------|------------------|------------------|
| 2022_LaCourse/qPCR      | Suspected TB                          | Culture positive                   | 1<br>2 | 7<br>6 | 1<br>6 | 6<br>5      | 0.6<br>315<br>79 | 0.8<br>024<br>69 | 63.157<br>89 | 80.246<br>91 | 0.1<br>106<br>65 | 0.4<br>146<br>76 | 0.8<br>484<br>82 | 0.0<br>442<br>37 | 0.7<br>157<br>64 | 0.8<br>891<br>74 |
| 2022_Andama/Xpert Ultra | Adults cough for greater than 2 weeks | Xpert Ultra/Solid and MGIT culture | 4<br>2 | 1<br>6 | 0<br>1 | 1<br>2<br>5 | 0.7<br>241<br>38 | 1                | 72.413<br>79 | 100          | 0.0<br>586<br>87 | 0.6<br>091<br>11 | 0.8<br>391<br>65 | 0                | 1                | 1                |
| 2022_Kang/SLIM assay    | Clinically suspected of active PTB    | Culture positive (sputum, BAL)     | 6<br>4 | 3<br>5 | 4<br>0 | 1<br>3<br>3 | 0.6<br>464<br>65 | 0.7<br>687<br>86 | 64.646<br>46 | 76.878<br>61 | 0.0<br>480<br>48 | 0.5<br>522<br>91 | 0.7<br>406<br>38 | 0.0<br>320<br>54 | 0.7<br>059<br>6  | 0.8<br>316<br>13 |
| 2022_Shapiro/PCR        | Adult over 16                         | Sputum Xpert Ultra/Culture         | 2<br>5 | 3<br>9 | 2<br>2 | 6<br>5      | 0.3<br>906<br>25 | 0.9<br>701<br>49 | 39.062<br>5  | 97.014<br>93 | 0.0<br>609<br>86 | 0.2<br>710<br>92 | 0.5<br>101<br>58 | 0.0<br>207<br>9  | 0.9<br>294       | 1                |
| 2022_Cox/Xpert Ultra    | <15 presumptive PTB                   | Induced sputum Xpert and culture   | 2<br>0 | 7<br>0 | 1<br>0 | 2<br>0<br>0 | 0.2<br>222<br>22 | 0.9<br>950<br>25 | 22.222<br>22 | 99.502<br>49 | 0.0<br>438<br>23 | 0.1<br>363<br>3  | 0.3<br>081<br>15 | 0.0<br>049<br>63 | 0.9<br>852<br>98 | 1                |

#### S12: Oral swab reference standard meta-regression

A larger variability in reference standard was seen in oral swab studies. A meta-regression therefore was carried out focused on sample type over culture v. Xpert as the model would have been overfitted with a larger number of covariates. Sixteen were classified as using sputum and four as gastric lavage. Firstly a separate meta-analysis was run for each reference test (Table S11), then a likelihood ratio test compared a further model (A) run without covariates to model (B) with equal variance and a covariate (A: without covariate sensitivity 56.7% [95% CI 44.3-68.2], specificity 91.3% [95% CI 81.0-96.3]), and there was statistical evidence ( $\text{Chi}^2 = 6.16$ , 2 df,  $P = 0.046$ ) of association of reference test type with sensitivity and/or specificity of oral swabs. Two further models were then analysed one comparing sensitivity with reference sample as a covariate (C) and one of specificity (D). These did not show a statistical significant difference in the modelled specificity or sensitivity

(likelihood ratio comparing model B and C: Chi2 = 2.01, 2 df, P = 0.156, model B and D: Chi2 = 2.30, 2 DF P = 0.130 [Table S11]). Lastly a model allowing for unequal variances (E) was run which showed a significant effect on specificity of reference sample types for sputum (Fixed effect specificity sputum Pr 9.27 x 10<sup>-10</sup>).

Table S12 to show model outputs when comparing gastric aspirate and induced sputum culture when used as a reference test for oral swabs.

| Model                                              | Gastric lavage          |                         | Sputum                  |                         |
|----------------------------------------------------|-------------------------|-------------------------|-------------------------|-------------------------|
|                                                    | Sensitivity<br>(95% CI) | Specificity<br>(95% CI) | Sensitivity<br>(95% CI) | Specificity<br>(95% CI) |
| Separate meta-analysis for each test               | 33.0 (10.1 – 68.3)      | 80.1 (28.5 – 97.6)      | 59.5 (46.5 – 71.2)      | 93.4 (85.8 – 97.1)      |
| Test comparison assuming equal variances (model B) | 33.6 (11.3 – 66.7)      | 59.5 (46.3 – 71.4)      | 59.5 (46.3 – 71.4)      | 93.4 (85.4 – 97.2)      |
| Model comparing sensitivity (C)                    |                         | 68.6 (32.4 – 90.9)      |                         | 94.0 (86.5 – 97.4)      |
| Model comparing specificity (D)                    | 26.5 (8.3 – 59.0)       |                         | 61.4 (48.1 – 73.2)      |                         |
| Test comparison allowing for unequal               | 33.0 (10.1 – 68.3)      | 80.1 (28.5 – 97.6)      | 59.5 (46.5 – 71.2)      | 93.4 (85.8 – 97.1)      |

|                        |  |  |  |  |
|------------------------|--|--|--|--|
| variances<br>(model E) |  |  |  |  |
|------------------------|--|--|--|--|

Supplementary table S13:

Other sample types

| Study                 | Participants                  | Method.of.testing                                   | Compariso<br>n                    | T<br>P | F<br>N | F<br>P | T<br>N | Sen<br>s         | Spe<br>c         | Sens_<br>Percen<br>tage | Spec_<br>Percen<br>tage | SE<br>_se<br>ns  | LC<br>I_<br>s<br>ens | UC<br>I_<br>s<br>ens | SE<br>_sp<br>ec  | LC<br>I_<br>s<br>pec | UC<br>I_<br>s<br>pec |
|-----------------------|-------------------------------|-----------------------------------------------------|-----------------------------------|--------|--------|--------|--------|------------------|------------------|-------------------------|-------------------------|------------------|----------------------|----------------------|------------------|----------------------|----------------------|
| Mouth<br>wash         |                               |                                                     |                                   |        |        |        |        |                  |                  |                         |                         |                  |                      |                      |                  |                      |                      |
| 1955_<br>Roger<br>s   | Proven or<br>suspected TB     | Digestion, brought<br>to 100ml and 10ml<br>filtered | 24 hour<br>sputum<br>culture      | 1<br>7 | 6      | 5      | 1<br>5 | 0.7<br>391<br>3  | 0.7<br>5         | 73.913<br>04            | 75                      | 0.0<br>915<br>61 | 0.5<br>596<br>72     | 0.9<br>185<br>89     | 0.0<br>968<br>25 | 0.5<br>602<br>24     | 0.9<br>397<br>76     |
| 1955_Rogers           |                               |                                                     | Gastric<br>aspirate               | 1      | 2      | 0      | 8<br>8 | 0.3<br>333<br>33 | 1                | 33.333<br>33            | 100                     | 0.2<br>721<br>66 | -<br>0.2<br>001<br>1 | 0.8<br>667<br>78     | 0                | 1                    | 1                    |
| 1994_<br>Evans        | Active TB and<br>controls     | Lysed RNA PCR                                       | Broncoscop<br>y/Sputum<br>culture | 5      | 1      | 3      | 1<br>0 | 0.8<br>333<br>33 | 0.7<br>692<br>31 | 83.333<br>33            | 76.923<br>08            | 0.1<br>521<br>45 | 0.5<br>351<br>29     | 1                    | 0.1<br>168<br>55 | 0.5<br>401<br>96     | 0.9<br>982<br>66     |
| 2009_<br>Davis        | Outpatients and<br>inpatients | PCR sec1                                            | Sputum<br>culture                 | 5<br>5 | 2<br>0 | 6      | 4<br>6 | 0.7<br>333<br>33 | 0.8<br>846<br>15 | 73.333<br>33            | 88.461<br>54            | 0.0<br>510<br>63 | 0.6<br>332<br>5      | 0.8<br>334<br>16     | 0.0<br>443<br>05 | 0.7<br>977<br>78     | 0.9<br>714<br>53     |
| Saliva                |                               |                                                     |                                   |        |        |        |        |                  |                  |                         |                         |                  |                      |                      |                  |                      |                      |
| 2015_<br>Gonza<br>lez | Adult<br>suspected TB         | Culture                                             | Sputum<br>culture                 | 2<br>8 | 4      | 0      | 0      | 0.8<br>75        | NA               | 87.5                    | NA                      | 0.0<br>584<br>63 | 0.7<br>604<br>12     | 0.9<br>895<br>88     | NA               | NA                   | NA                   |

|                        |                                             |                     |                           |        |        |   |   |                  |                  |              |              |                  |                  |                  |                  |                      |                  |
|------------------------|---------------------------------------------|---------------------|---------------------------|--------|--------|---|---|------------------|------------------|--------------|--------------|------------------|------------------|------------------|------------------|----------------------|------------------|
| 2022_<br>Byanya<br>ima | Xpert Ultra<br>positive for TB<br>on sputum | Xpert Ultra         | Sputum<br>culture         | 7<br>0 | 8      | 2 | 1 | 0.8<br>974<br>36 | 0.3<br>333<br>33 | 89.743<br>59 | 33.333<br>33 | 0.0<br>343<br>52 | 0.8<br>301<br>06 | 0.9<br>647<br>66 | 0.2<br>721<br>66 | -<br>0.2<br>001<br>1 | 0.8<br>667<br>78 |
| Other                  |                                             |                     |                           |        |        |   |   |                  |                  |              |              |                  |                  |                  |                  |                      |                  |
| 2003_<br>Eguch<br>i    | Patients with<br>TB                         | Ogawa egg<br>medium | Sputum<br>culture         | 1<br>3 | 6<br>2 | 0 | 0 | 0.1<br>733<br>33 | NA               | 17.333<br>33 | NA           | 0.0<br>437<br>09 | 0.0<br>876<br>63 | 0.2<br>590<br>04 | NA               | NA                   | NA               |
| 2003_<br>Eguch<br>i    | Patients with<br>TB                         | PCR                 | Sputum<br>culture         | 5<br>1 | 1      | 0 | 0 | 0.9<br>807<br>69 | NA               | 98.076<br>92 | NA           | 0.0<br>190<br>45 | 0.9<br>434<br>41 | 1                | NA               | NA                   | NA               |
| 2012_<br>Palaku<br>ru  | Pulmonary TB                                | Nested PCR          | AFB<br>positive<br>sputum | 2<br>3 | 2      | 0 | 0 | 0.9<br>2         | NA               | 92           | NA           | 0.0<br>542<br>59 | 0.8<br>136<br>53 | 1                | NA               | NA                   | NA               |

SF1:



SROC curve (bivariate model) for laryngeal swabs

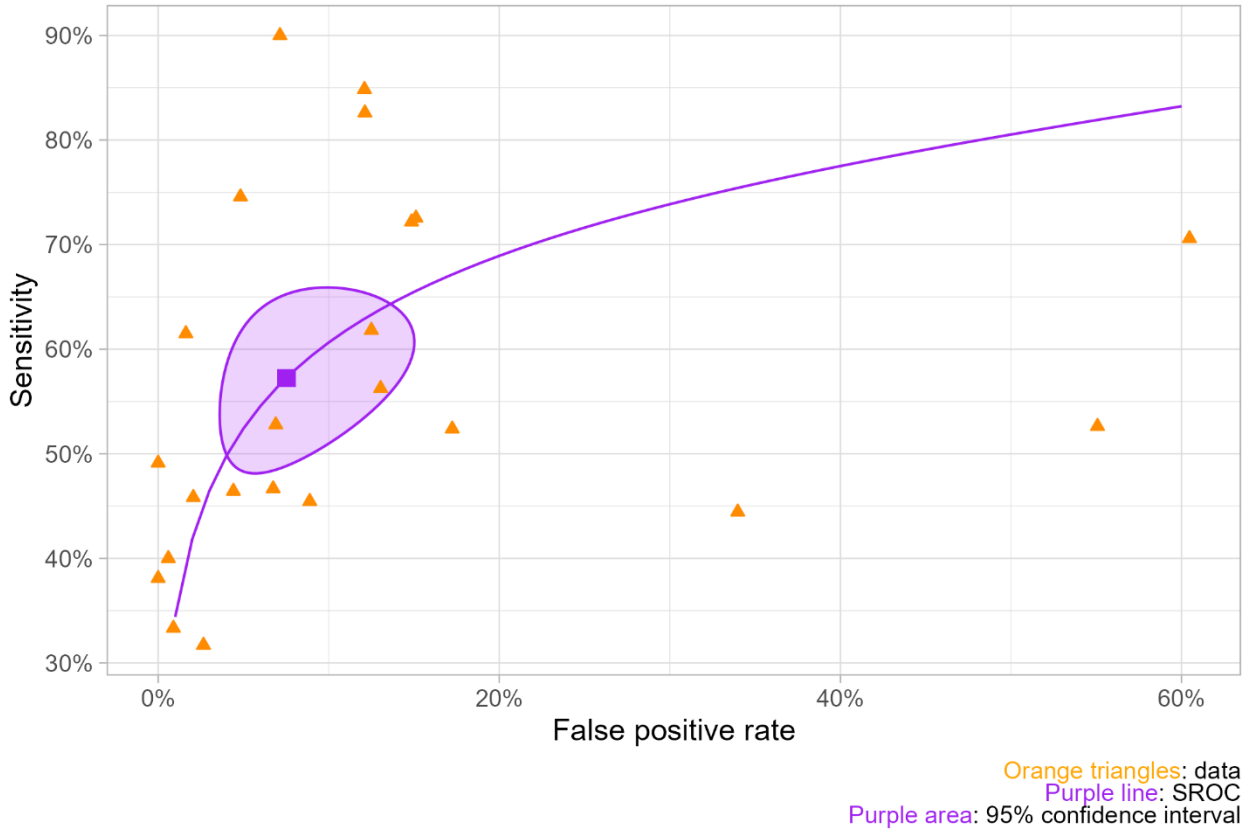

SF2:

SROC curve (bivariate model) for NPA with microbiological standard

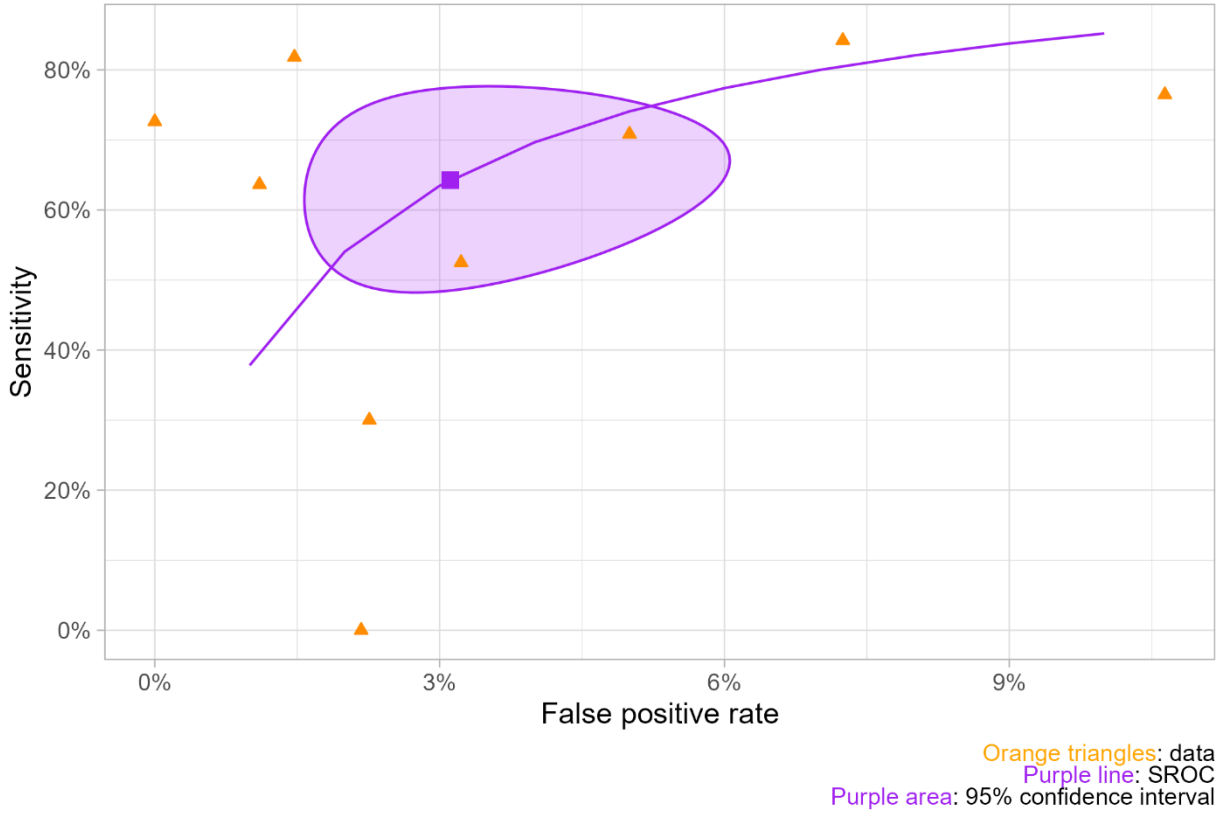

SF3:

SROC curve (bivariate model) for NPA clinical standard

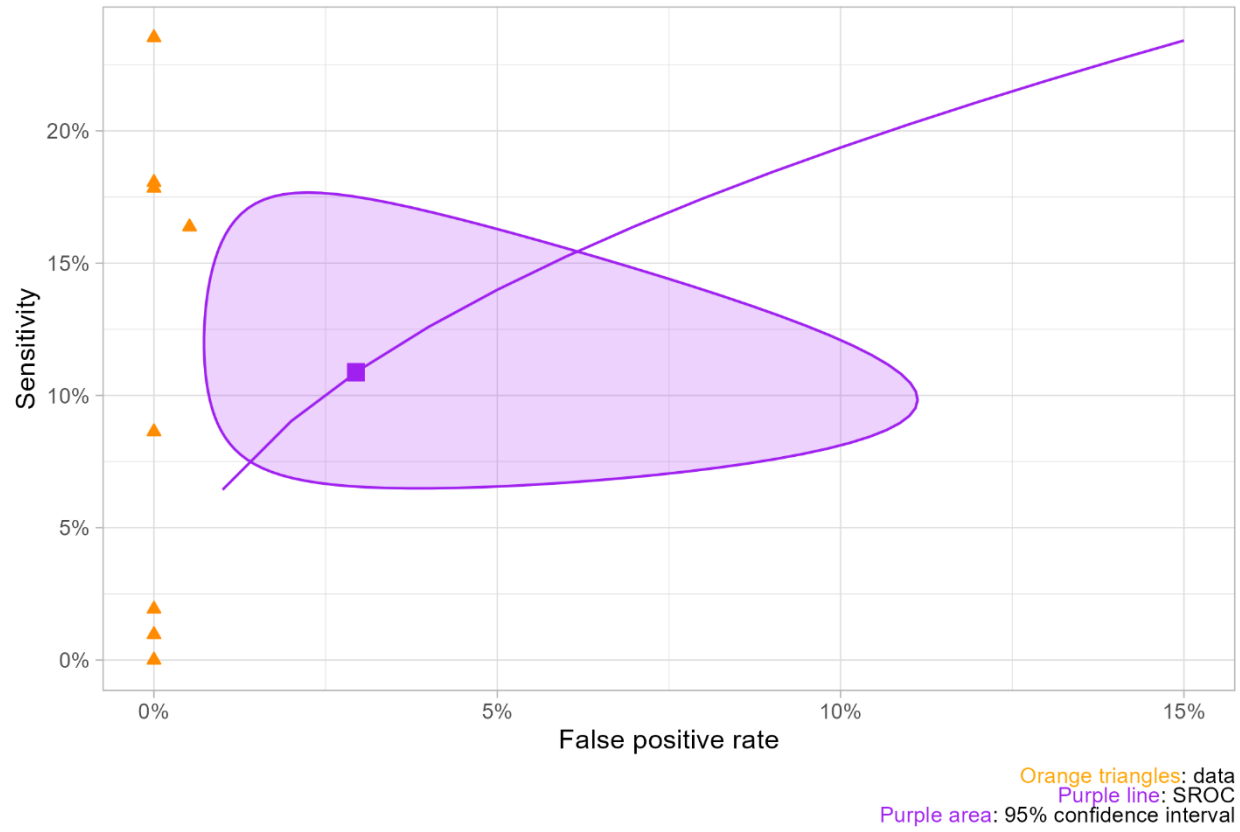

SF4:

SROC curve (bivariate model) for oral swabs

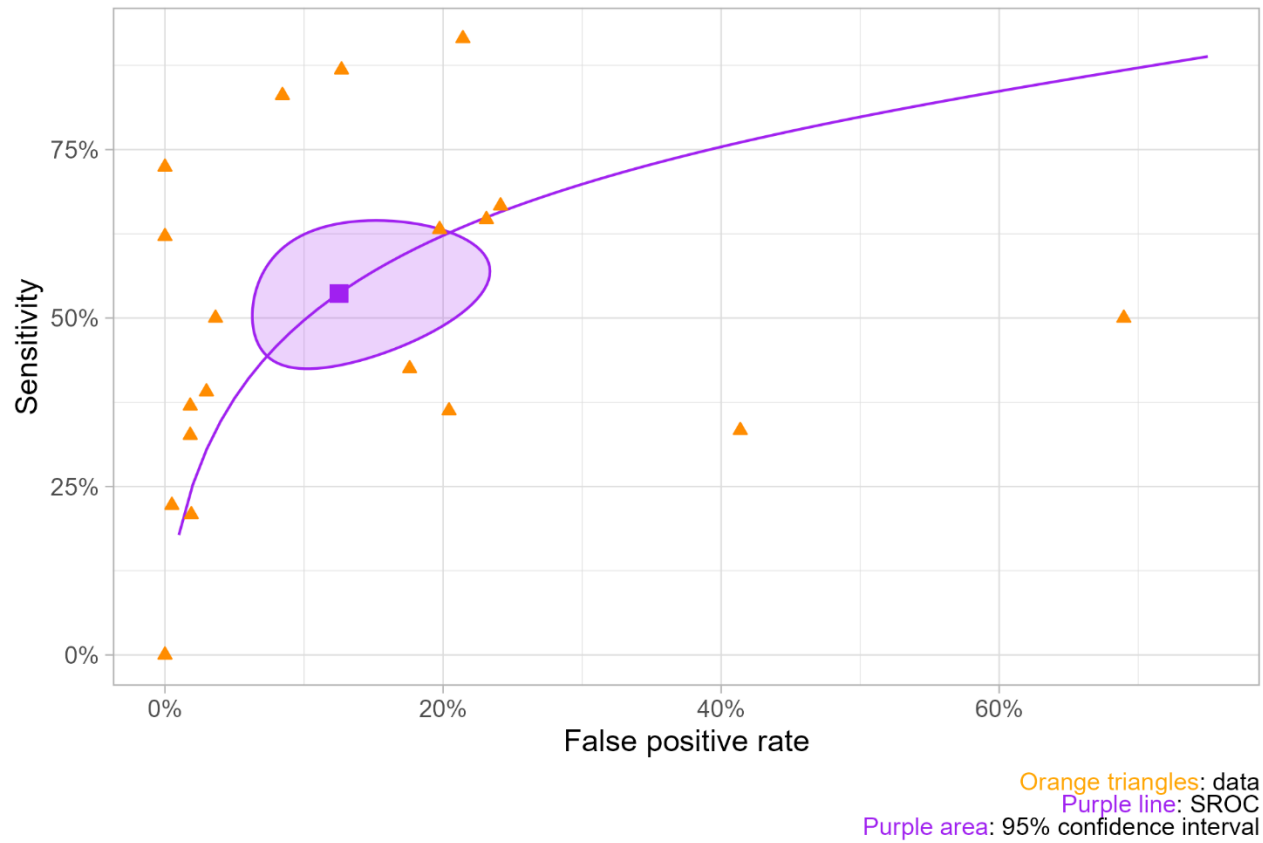

SF5: Bias of individual studies presented via each domain question and overall rating.

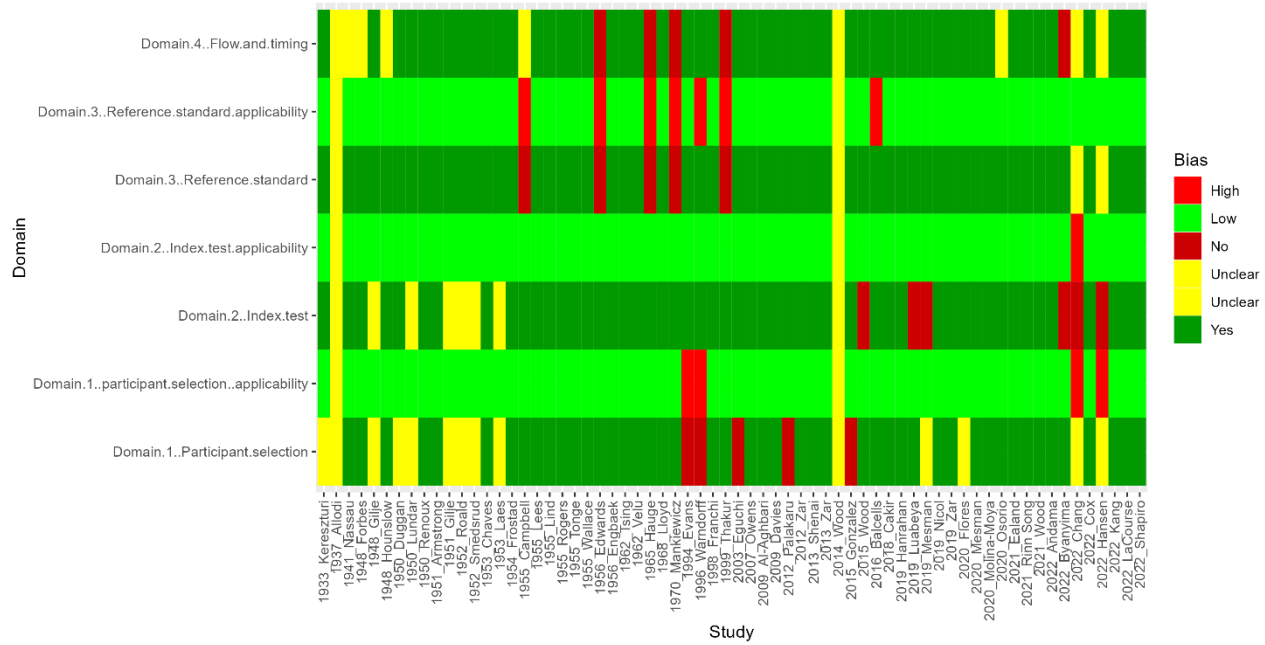

SF6: Bias of individual studies presented by domain.

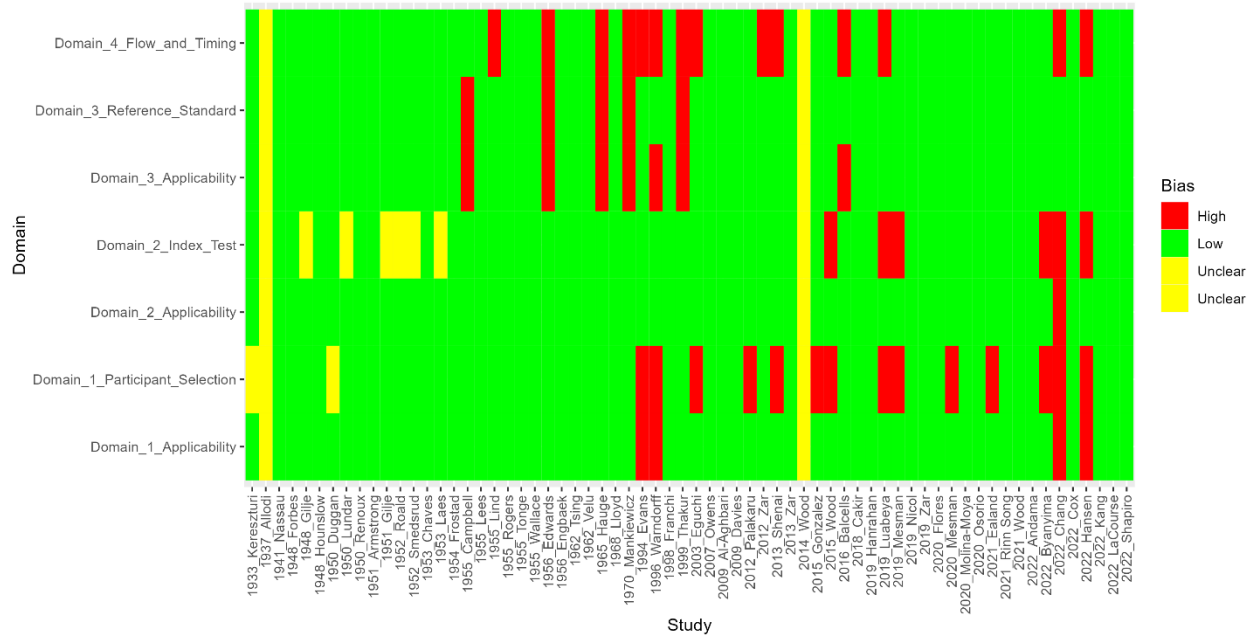

1. Kereszturi C. ACID-FAST BACILLI IN THE STOMACH LAVAGE AND FECES OF TUBERCULOUS CHILDREN. JAMA. 1933 May 13;100(19):1481.
2. Allodi A, Silorata AB, Marpillero P. 1937 Allodi et al PDF.pdf. Pubblicazione mensile dell'Ospedale Maria Vittoria di Torino. 1937 Dec;19(6):721.
3. Nassau E. The Culture of Tubercle Bacilli from Laryngeal Swabs. Proceedings of the Royal Society of Medicine. 1941;34(7):397–400.
4. Forbes VH GB; Hurford, JV; Smith, BJD; Springett. The Laryngeal Swab in Early and Convalescent Cases of Pulmonary Tuberculosis. Lancet. 1948;141–3.
5. Hounslow AG, Usher G. Examination for tubercle bacilli by gastric lavage and by laryngeal swab: a comparative study. Tubercle. 1948 Feb;29(2):25–31.

6. Duggan L M: Delamater. Laryngeal vs. gastric cultures in the detection of tubercle bacilli. Canadian Medical Association journal. 1950;62(1):54–6.
7. Renoux A GE: Francais. [Detection of the tubercle bacillus by culture of the laryngeal swab; comparison with the results of slide examinations and culture of gastric lavage fluid]. La Presse medicale. 1950;58(22):392–3.
8. Armstrong AR. The Laryngeal Swab Specimen in the Cultural Diagnosis of Pulmonary Tuberculosis. Canadian Medical Association Journal. 1951;65(6):575–8.
9. Szabo I. Experiences with the Cultivation of Tubercle Bacilli in Sula's Fluid Ascitic Medium. / Nase zkusenosti s kultivaci myco tbc v tekute ascitove pude podle Suly. Casopis Lekarů Ceskych. 1951;90(26):811–3.
10. Chaves D AD: Peizer, LR: Widelock. A Comparative Study of the Effectiveness of Laryngeal Swabs and Gastric Aspiration for the Detection of M. tuberculosis in Chest Clinic Patients. American Review of Tuberculosis and Pulmonary Diseases. 1953;67(5):598–603.
11. Frostad S. On the Reliability of the Laryngeal Swab Method and the Gastric Lavage Method for Tubercle Bacilli Demonstration. Acta Tuberculosea Scandinavica. 1954;29(3):214–22.
12. Campbell J AH: Kelly, JH: Banks. Laryngeal Swabs for the Detection of Tubercle Bacilli in Patients without Sputum. Medical Journal of Australia. 1955;2(21):852–4.
13. Lees AW, Miller TJR, Roberts GBS. BRONCHIAL LAVAGE FOR THE RECOVERY OF THE TUBERCLE BACILLUS. The Lancet. 1955 Oct;266(6894):800–1.
14. Lind A A: Lundin. The Laryngeal Swab Method for Detection of Tubercle Bacilli in Pulmonary Tuberculosis. A Comparison between Inoculation and Cultivation from Gastric Lavage, Sputum and Laryngeal Swab Specimens. Acta Tuberculosea Scandinavica. 1955;31(2):178–84.
15. Wallace AT, Ross JD, Schiller E. Laryngeal swabs for isolation of tubercle bacilli. British Journal of Tuberculosis and Diseases of the Chest. 1955 Jul;49(3):225–30.
16. Edwards JMB. The Storage of Laryngeal Swabs. Monthly Bull Ministry of Health & Pub Health Lab Service (directed by Med Res Council). 1956;15:95–8.

17. Engbaek V HC: Holm, S: Melton. Examination for Tubercle Bacilli by the Gastric Lavage and Laryngeal Swab Methods. A Comparative Study. *Acta Tuberculosea Scandinavica*. 1956;32(3):315–21.
18. Tonge PG JI: Hughes. A Comparative Study of Laryngeal Swabs and Gastric Lavage, in the Detection of Tubercle Bacilli. *American Review of Tuberculosis and Pulmonary Diseases*. 1956;73(6):930–9.
19. Hsing YT CT: Ma. A Comparative Study of the Efficacy of the Laryngeal Swab, Bronchial Lavage, Gastric Lavage, and Direct Sputum Examination Methods in detecting Tubercle Bacilli in a Series of 1,320 Patients. *American Review of Respiratory Disease*. 1962;86(1):16–20.
20. Velu TV S: Narayana, ASL: Subbaiah. A Comparison of the Results of Bacteriological Examination of a Sputum Collection and a Pair of Laryngeal Swab Specimens in Patients receiving Chemotherapy for Pulmonary Tuberculosis. *Tubercle*. 1962;43(1):1–10.
21. Kertay N, Marton S. [Comparative bacteriological investigations of the detection of *Mycobacterium tuberculosis*, using bronchial secretions obtained with the Marton method]. *Acta Tuberc Pneumol Scand*. 1962;41:161–8.
22. Hauge J HE: Schaanning. The Value of Repeated Laryngeal Swab Examinations during the Day. *Acta Tuberculosea et Pneumol Scandinavica*. 1965;46(2):141–3.
23. PechÁCek M. Comparative Study on Cultivation of *Mycobacterium tuberculosis* from Sputum, Bronchial Washout and Laryngeal Swabs. / Srovnávací studie o kultivaci *Myco the* ze sputa, bronchiálních výplachu a laryngeálních výteru. *Rozhledy v Tuberkulose*. 1966;26(8):537–40.
24. Lloyd AVC. Bacteriological diagnosis of tuberculosis in children. A comparative study of gastric lavage and laryngeal swab methods. *East African Medical Journal*. 1968;45(3):140–3.
25. Mankiewi.E I : Shimro. LARYNGEAL SWAB METHOD FOR DETECTION OF TUBERCLE BACILLI IN PULMONARY TUBERCULOSIS. *European Journal of Clinical and Biological Research*. 1970;15(3):328-.
26. Thakur CA A: Coulter, JB: Zutshi, K: Pande, HK: Sharma, M: Banerjee, A: Richardson, K: Hart. Laryngeal swabs for diagnosing tuberculosis. *Annals of tropical paediatrics*. 1999;19(4):333–6.
27. Gilje A. Cultural Demonstration of Tubercle Bacilli by Laryngeal Swabbing. / Dyrking av larynxavstryk for påvisning av tuberkelbasiller. *Nordisk Medicin*. 1948;40(44):1995–6.



28. Lundar J. [A comparison of laryngeal swabbing and gastric lavage as methods of demonstrating the tubercle bacillus]. *Nordisk medicin*. 1950;44(33):1306–7.
29. Gilje A. Demonstration of Tubercle Bacilli in Cultures : Comparison between Laryngeal Swabbing and Gastric Lavage. *Nordisk Medecin*. 1951;45(4):129–30.
30. Roald OK S: Thomassen. Reliability of the Laryngeal Swab Method for Tubercle Bacilli Cultures. / Larynxkulturers pålitelighet for påvising av tuberkelbasiller. *Nordisk Medicin*. 1952;48(47):1619–20.
31. Smedsrud K. Cultures from Laryngeal Swabs as a Method of assessing the Quantity of Bacilli in Pulmonary Tuberculosis. / Larynxkultur til kvantitativ vurdering av basillutskillelsen ved tuberkulose. Deres betydning i det praktiske tuberkulosearbeid. *Nordisk Medicin*. 1952;47(19):623–6.
32. Laes T. Comparison of Tubercle Bacilli Cultivation from Throat Swabs and from Gastric Washings. *Nordisk Medecin*. 1953;49(8):289–90.
33. Franchi P LM: Cama, RI: Gilman, RH: Montenegro James, S: Sheen. Detection of Myobacterium tuberculosis in nasopharyngeal aspirate samples in children. *Lancet (British edition)*. 1998;352(9141):1681–2.
34. Owens S, Abdel-Rahman IE, Balyejusa S, Musoke P, Cooke RPD, Parry CM, et al. Nasopharyngeal aspiration for diagnosis of pulmonary tuberculosis. *Archives of Disease in Childhood*. 2007 Apr 11;92(8):693–6.
35. Cakr M E: Özdemir, A: Daskaya, H: Umutoglu, T: Yüksel. The value of nasopharyngeal aspirate, gastric aspirate and bronchoalveolar lavage fluid in the diagnosis of childhood tuberculosis. *Turkish Journal of Pediatrics*. 2018;60(1):10–3.
36. Zar MP Heather J: Workman, Lesley: Isaacs, Washiefa: Munro, Jacinta: Black, Faye: Eley, Brian: Allen, Veronica: Boehme, Catharina C: Zemanay, Widaad: Nicol. Rapid molecular diagnosis of pulmonary tuberculosis in children using nasopharyngeal specimens. *Clinical infectious diseases : an official publication of the Infectious Diseases Society of America*. 2012;55(8):1088–95.
37. Zar MP Heather J: Workman, Lesley: Isaacs, Washiefa: Dheda, Keertan: Zemanay, Widaad: Nicol. Rapid diagnosis of pulmonary tuberculosis in African children in a primary care setting by use of Xpert MTB/RIF on respiratory specimens: a prospective study. *The Lancet Global health*. 2013;1(2):e97–104.

38. Hanrahan CF, Dansey H, Mutunga L, France H, Omar SV, Ismail N, et al. Diagnostic strategies for childhood tuberculosis in the context of primary care in a high burden setting: the value of alternative sampling methods. *Paediatrics and International Child Health*. 2019 Apr 3;39(2):88–94.
39. Zar MP HJ, Workman, LJ, Prins, M, Bateman, LJ, Mbhele, SP, Whitman, CB, Denking, CM, Nicol. Tuberculosis diagnosis in children using Xpert ultra on different respiratory specimens. *American Journal of Respiratory and Critical Care Medicine*. 2019;200(12):1531–8.
40. Song R, Click ES, McCarthy KD, Heilig CM, Mchembere W, Smith JP, et al. Sensitive and Feasible Specimen Collection and Testing Strategies for Diagnosing Tuberculosis in Young Children. *JAMA Pediatr*. 2021 May 3;175(5):e206069.
41. Osório DV, Munyangaju I, Muhiwa A, Nacarapa E, Nhangave AV, Ramos JM. Lipoarabinomannan Antigen Assay (TB-LAM) for Diagnosing Pulmonary Tuberculosis in Children with Severe Acute Malnutrition in Mozambique. *Journal of Tropical Pediatrics*. 2021 Jul 2;67(3):fmaa072.
42. Al-Aghbari N, Al-Sonboli N, Yassin MA, Coulter JBS, Atef Z, Al-Eryani A, et al. Multiple Sampling in One Day to Optimize Smear Microscopy in Children with Tuberculosis in Yemen. *Pai M*, editor. *PLoS ONE*. 2009 Apr 9;4(4):e5140.
43. Wood G R, Luabeya, A, Wilbur, A, Jones Engel, L, Filander, E, Hatherill, M, Cangelosi. Analysis of prevalent tuberculosis by using oral swab PCR. *International Journal of Infectious Diseases*. 2014;21:263–263.
44. Wood RC, Luabeya AK, Weigel KM, Wilbur AK, Jones-Engel L, Hatherill M, et al. Detection of Mycobacterium tuberculosis DNA on the oral mucosa of tuberculosis patients. *Sci Rep*. 2015 Aug;5(1):8668.
45. Luabeya AK, Wood RC, Shenje J, Filander E, Ontong C, Mabwe S, et al. Noninvasive Detection of Tuberculosis by Oral Swab Analysis. *Miller MB*, editor. *J Clin Microbiol*. 2019 Mar;57(3):e01847-18.
46. Mesman AW, Calderon R, Soto M, Coit J, Aliaga J, Mendoza M, et al. Mycobacterium tuberculosis detection from oral swabs with Xpert MTB/RIF ULTRA: a pilot study. *BMC Res Notes*. 2019 Dec;12(1):349.
47. Nicol MP, Wood RC, Workman L, Prins M, Whitman C, Ghebrekristos Y, et al. Microbiological diagnosis of pulmonary tuberculosis in children by oral swab polymerase chain reaction. *Scientific Reports*. 2019;9(1):1–5.
48. Flores JA, Calderón R, Mesman AW, Soto M, Coit J, Aliaga J, et al. Detection of Mycobacterium Tuberculosis DNA in Buccal Swab Samples from Children in Lima, Peru. *Pediatric Infectious Disease Journal*. 2020 Nov;39(11):e376–80.

49. Mesman MF AW: Calderon, RI: Pollock, NR: Soto, M: Mendoza, M: Coit, J: Zhang, ZB: Aliaga, J: Lecca, L: Holmberg, RC: Franke. Molecular detection of *Mycobacterium tuberculosis* from buccal swabs among adult in Peru. *Scientific Reports* [Internet]. 2020;10(1). Available from: <Go to ISI>://WOS:000603258300040
50. Molina-Moya B, Ciobanu N, Hernandez M, Prat-Aymerich C, Crudu V, Adams ER, et al. Molecular Detection of *Mycobacterium tuberculosis* in Oral Mucosa from Patients with Presumptive Tuberculosis. *JCM*. 2020 Dec 21;9(12):4124.
51. Lima F, Santos AS, Oliveira RD, Silva CCR, Gonçalves CCM, Andrews JR, et al. Oral swab testing by Xpert® MTB/RIF Ultra for mass tuberculosis screening in prisons. *Journal of Clinical Tuberculosis and Other Mycobacterial Diseases*. 2020 May;19:100148.
52. Ealand C, Peters J, Jacobs O, Sewcharran A, Ghoor A, Golub J, et al. Detection of *Mycobacterium tuberculosis* Complex Bacilli and Nucleic Acids From Tongue Swabs in Young, Hospitalized Children. *Front Cell Infect Microbiol*. 2021 Jun 14;11:696379.
53. Song Y, Ma Y, Liu R, Shang Y, Ma L, Huo F, et al. Diagnostic Yield of Oral Swab Testing by TB-LAMP for Diagnosis of Pulmonary Tuberculosis. *IDR*. 2021 Jan;Volume 14:89–95.
54. Wood RC, Andama A, Hermansky G, Burkot S, Asege L, Job M, et al. Characterization of oral swab samples for diagnosis of pulmonary tuberculosis. *PLoS ONE*. 2021;16(5 May 2021):1–13.
55. LaCourse SM, Seko E, Wood R, Bundi W, Ouma GS, Agaya J, et al. Diagnostic performance of oral swabs for non-sputum based TB diagnosis in a TB/HIV endemic setting. Hasnain SE, editor. *PLoS ONE*. 2022 Jan 13;17(1):e0262123.
56. Andama A, Whitman GR, Crowder R, Reza TF, Jaganath D, Mulondo J, et al. Accuracy of Tongue Swab Testing Using Xpert MTB-RIF Ultra for Tuberculosis Diagnosis. *Journal of clinical microbiology*. 2022 Jul 20;60(7):e0042122.
57. Chang A, Mzava O, Djomnang LAK, Lenz JS, Burnham P, Kaplinsky P, et al. Metagenomic DNA sequencing to quantify *Mycobacterium tuberculosis* DNA and diagnose tuberculosis. *Scientific reports*. 2022 Oct 10;12(1):16972.
58. Kang YA, Koo B, Kim OH, Park JH, Kim HC, Lee HJ, et al. Gene-Based Diagnosis of Tuberculosis from Oral Swabs with a New Generation Pathogen Enrichment Technique. Singh A, editor. *Microbiol Spectr*. 2022 Jun 29;10(3):e00207-22.
59. Shapiro AE, Olson AM, Kidoguchi L, Niu X, Ngcobo Z, Magcaba ZP, et al. Complementary Nonsputum Diagnostic Testing for Tuberculosis in People with HIV Using Oral Swab PCR and Urine Lipoarabinomannan Detection. Turenne CY, editor. *J Clin Microbiol*. 2022 Aug 17;60(8):e00431-22.

60. Cox H, Workman L, Bateman L, Franckling-Smith Z, Prins M, Luiz J, et al. Oral Swab Specimens Tested With Xpert MTB/RIF Ultra Assay for Diagnosis of Pulmonary Tuberculosis in Children: A Diagnostic Accuracy Study. *Clinical Infectious Diseases*. 2022 Dec 19;75(12):2145–52.
61. ROGERS DE, COOKE GM, MEYERS CE. The detection of tubercle bacilli in mouth wash specimens by the use of membrane filter cultures. *American review of tuberculosis*. 1955;71(3, Part 1):371–81.
62. Evans D, Goyal M, Taylor IK, Shaw RJ. Identification of *M. tuberculosis* ribosomal RNA in mouthwash samples from patients with tuberculosis. *Respiratory Medicine*. 1994 Oct;88(9):687–91.
63. Davis JL, Huang L, Kovacs JA, Masur H, Murray P, Havlir DV, et al. Polymerase Chain Reaction of *secA1* on Sputum or Oral Wash Samples for the Diagnosis of Pulmonary Tuberculosis. *CLIN INFECT DIS*. 2009 Mar 15;48(6):725–32.
64. Warndoff D, Glynn J, Fine P, Jamil S, de Wit M, Munthali M, et al. Polymerase chain reaction of nasal swabs from Tuberculosis patients and their contacts. *International Journal of Leprosy*. 1996;64(4):404–8.
65. Shenai S, Amisano D, Ronacher K, Kriel M, Banada PP, Song T, et al. Exploring Alternative Biomaterials for Diagnosis of Pulmonary Tuberculosis in HIV-Negative Patients by Use of the GeneXpert MTB/RIF Assay. *J Clin Microbiol*. 2013 Dec;51(12):4161–6.
66. González Mediero P G: Vázquez Gallardo, R: Pérez Del Molino, ML: Diz Dios. Evaluation of two commercial nucleic acid amplification kits for detecting *Mycobacterium tuberculosis* in saliva samples. *Oral diseases*. 2015;21(4):451–5.
67. Byanyima P, Kaswabuli S, Musisi E, Nabakiibi C, Zawedde J, Sanyu I, et al. Feasibility and Sensitivity of Saliva GeneXpert MTB/RIF Ultra for Tuberculosis Diagnosis in Adults in Uganda. *Microbiology spectrum*. 2022 Oct 26;10(5):e0086022.
68. Hansen J, Kolbe K, König IR, Scherließ R, Hellfritzsch M, Malm S, et al. Lipobiotin-capture magnetic bead assay for isolation, enrichment and detection of *Mycobacterium tuberculosis* from saliva. *PloS one*. 2022 Jul 15;17(7):e0265554.
69. Eguchi J, Ishihara K, Watanabe A, Fukumoto Y, Okuda K. PCR method is essential for detecting *Mycobacterium tuberculosis* in oral cavity samples. *Oral Microbiology and Immunology*. 2003;18(3):156–9.
70. Palakuru SK, Lakshman VK, Bhat KG. Microbiological analysis of oral samples for detection of *Mycobacterium tuberculosis* by nested polymerase chain reaction in tuberculosis patients with periodontitis. *Dental Research Journal*. 2012;9(6):6.

71. Balcells ME, Huilcaman M, Pena C, Castillo C, Carvajal C, Scioscia N, et al. M. tuberculosis DNA detection in nasopharyngeal mucosa can precede tuberculosis development in contacts. *International Journal of Tuberculosis and Lung Disease*. 2016;20(6):848–52.
